# Supplementary material for: Novel Harziane Diterpenes from Deep-Sea Sediment Fungus Trichoderma sp. SCSIOW21 and Their Potential Anti-Inflammatory Effects
Source: MDPI journal article supplement (doi:10.3390/md19120689), 2021-12-01
Supplement: s1 [file s1]

## Supporting Information

### **Novel Harziane Diterpenes from Deep-Sea Sediment Fungus *Trichoderma* sp. SCSIW21 and their Potential Anti-Inflammatory Effects**

Hongxu Li<sup>1,2</sup>, Xinyi Liu<sup>1</sup>, Xiaofan Li<sup>1,\*</sup>, Zhangli Hu<sup>1,2</sup> and Liyan Wang<sup>1,\*</sup>

<sup>1</sup> Shenzhen Key Laboratory of Marine Bioresource and Eco-environmental science, College of Life Sciences and Oceanography, Shenzhen University, Shenzhen 518060, China; lhx@szu.edu.cn (H. L.); (X. L.); (X. L.); (Z. H.); (L. W.)

<sup>2</sup> Key Laboratory of Optoelectronic Engineering, Shenzhen University, Shenzhen 518060, China

\* Correspondence: lwang@szu.edu.cn (L. W.); lixf@szu.edu.cn (X. L.) Tel.: +86-755-2601-2653

## List of Supporting Information

**Table S1.** Reported literatures about harziane type diterpenes from 1992 to 2021.

**Table S2.**  $^1\text{H}$  NMR (600 MHz) and  $^{13}\text{C}$  NMR (150 MHz) data for compound **2** in  $\text{DMSO-}d_6$ .

**Table S3.**  $^1\text{H}$  NMR (600 MHz) and  $^{13}\text{C}$  NMR (150 MHz) data for compound **3** in  $\text{DMSO-}d_6$ .

**Table S4.** Cartesian coordinates for the lowest-energy conformer of compound **1** in ECD calculation.

**Table S5.** Cartesian coordinates for the lowest-energy conformer of compound **4** in ECD calculation.

**Table S6.** Cartesian coordinates for the lowest-energy conformer of compound **5** in ECD calculation.

**Table S7.** Cartesian coordinates for the lowest-energy conformer of compound **6** in ECD calculation.

**Table S8.** Cartesian coordinates for the lowest-energy conformer of compound **7** in ECD calculation.

**Figure S1.** Reported compounds from previous literatures from 1992 to 2021.

**Figure S2.**  $^1\text{H}$  NMR (600 MHz,  $\text{DMSO-}d_6$ ) spectrum of compound **1**, at 25°C.

**Figure S3.**  $^{13}\text{C}$  NMR (150 MHz,  $\text{DMSO-}d_6$ ) spectrum of compound **1**, at 25°C.

**Figure S4.**  $^1\text{H-}^1\text{H}$  COSY ( $\text{DMSO-}d_6$ ) spectrum of compound **1**, at 25°C.

**Figure S5.** HSQC ( $\text{DMSO-}d_6$ ) spectrum of compound **1**, at 25°C.

**Figure S6.** HMBC ( $\text{DMSO-}d_6$ ) spectrum of compound **1**, at 25°C.

**Figure S7.** ROESY ( $\text{DMSO-}d_6$ ) spectrum of compound **1**, at 25°C.

**Figure S8.** HRESIMS spectrum of compound **1**.

**Figure S9.**  $^1\text{H}$  NMR (600 MHz,  $\text{DMSO-}d_6$ ) spectrum of compound **2**, at 25°C.

**Figure S10.**  $^{13}\text{C}$  NMR (150 MHz,  $\text{DMSO-}d_6$ ) spectrum of compound **2**, at 25°C.

**Figure S11.**  $^1\text{H-}^1\text{H}$  COSY ( $\text{DMSO-}d_6$ ) spectrum of compound **2**, at 25°C.

**Figure S12.** HSQC (DMSO-*d*<sub>6</sub>) spectrum of compound **2**, at 25°C.

**Figure S13.** HMBC (DMSO-*d*<sub>6</sub>) spectrum of compound **2**, at 25°C.

**Figure S14.** ROESY (DMSO-*d*<sub>6</sub>) spectrum of compound **2**, at 25°C.

**Figure S15.** <sup>1</sup>H NMR (600 MHz, DMSO-*d*<sub>6</sub>) spectrum of compound **3**, at 25°C.

**Figure S16.** <sup>13</sup>C NMR (150 MHz, DMSO-*d*<sub>6</sub>) spectrum of compound **3**, at 25°C.

**Figure S17.** <sup>1</sup>H-<sup>1</sup>H COSY (DMSO-*d*<sub>6</sub>) spectrum of compound **3**, at 25°C.

**Figure S18.** HSQC (DMSO-*d*<sub>6</sub>) spectrum of compound **3**, at 25°C.

**Figure S19.** HMBC (DMSO-*d*<sub>6</sub>) spectrum of compound **3**, at 25°C.

**Figure S20.** ROESY (DMSO-*d*<sub>6</sub>) spectrum of compound **3**, at 25°C.

**Figure S21.** <sup>1</sup>H NMR (600 MHz, DMSO-*d*<sub>6</sub>) spectrum of compound **4**, at 25°C.

**Figure S22.** <sup>13</sup>C NMR (150 MHz, DMSO-*d*<sub>6</sub>) spectrum of compound **4**, at 25°C.

**Figure S23.** <sup>1</sup>H-<sup>1</sup>H COSY (DMSO-*d*<sub>6</sub>) spectrum of compound **4**, at 25°C.

**Figure S24.** HSQC (DMSO-*d*<sub>6</sub>) spectrum of compound **4**, at 25°C.

**Figure S25.** HMBC (DMSO-*d*<sub>6</sub>) spectrum of compound **4**, at 25°C.

**Figure S26.** ROESY (DMSO-*d*<sub>6</sub>) spectrum of compound **4**, at 25°C.

**Figure S27.** HRESIMS spectrum of compound **4**.

**Figure S28.** <sup>1</sup>H NMR (600 MHz, DMSO-*d*<sub>6</sub>) spectrum of compound **5**, at 25°C.

**Figure S29.** <sup>13</sup>C NMR (150 MHz, DMSO-*d*<sub>6</sub>) spectrum of compound **5**, at 25°C.

**Figure S30.** <sup>1</sup>H-<sup>1</sup>H COSY (DMSO-*d*<sub>6</sub>) spectrum of compound **5**, at 25°C.

**Figure S31.** HSQC (DMSO-*d*<sub>6</sub>) spectrum of compound **5**, at 25°C.

**Figure S32.** HMBC (DMSO-*d*<sub>6</sub>) spectrum of compound **5**, at 25°C.

**Figure S33.** ROESY (DMSO-*d*<sub>6</sub>) spectrum of compound **5**, at 25°C.

**Figure S34.** HRESIMS spectrum of compound **5**.

**Figure S35.** <sup>1</sup>H NMR (600 MHz, DMSO-*d*<sub>6</sub>) spectrum of compound **6**, at 25°C.

**Figure S36.** <sup>13</sup>C NMR (150 MHz, DMSO-*d*<sub>6</sub>) spectrum of compound **6**, at 25°C.

**Figure S37.**  $^1\text{H}$ - $^1\text{H}$  COSY (DMSO- $d_6$ ) spectrum of compound **6**, at 25°C.

**Figure S38.** HSQC (DMSO- $d_6$ ) spectrum of compound **6**, at 25°C.

**Figure S39.** HMBC (DMSO- $d_6$ ) spectrum of compound **6**, at 25°C.

**Figure S40.** ROESY (DMSO- $d_6$ ) spectrum of compound **6**, at 25°C.

**Figure S41.** HRESIMS spectrum of compound **6**.

**Figure S42.**  $^1\text{H}$  NMR (600 MHz, DMSO- $d_6$ ) spectrum of compound **7**, at 25°C.

**Figure S43.**  $^{13}\text{C}$  NMR (150 MHz, DMSO- $d_6$ ) spectrum of compound **7**, at 25°C.

**Figure S44.**  $^1\text{H}$ - $^1\text{H}$  COSY (DMSO- $d_6$ ) spectrum of compound **7**, at 25°C.

**Figure S45.** HSQC (DMSO- $d_6$ ) spectrum of compound **7**, at 25°C.

**Figure S46.** HMBC (DMSO- $d_6$ ) spectrum of compound **7**, at 25°C.

**Figure S47.** ROESY (DMSO- $d_6$ ) spectrum of compound **7**, at 25°C.

**Figure S48.** HRESIMS spectrum of compound **7**.

**Figure S49.** Comparison of the calculated ECD spectrum of (2*S*, 5*R*, 6*R*, 8*S*, 13*S*, 14*S*)-**1** at the B3LYP/6-311+G(d, p) level with the experimental ECD spectrum of **1** in MeOH,  $\sigma = 0.41$  eV, shift = +10 nm.

**Figure S50.** Comparison of the calculated ECD spectrum of (2*S*, 5*R*, 6*R*, 13*S*, 14*S*)-**4** at the B3LYP/6-311+G(d, p) level with the experimental ECD spectrum of **1** in MeOH,  $\sigma = 0.49$  eV, shift = +10 nm.

**Figure S51.** Comparison of the calculated ECD spectrum of (2*S*, 5*R*, 6*R*, 8*S*, 13*S*, 14*S*)-**5** at the B3LYP/6-311+G(d, p) level with the experimental ECD spectrum of **1** in MeOH,  $\sigma = 0.40$  eV, shift = +15 nm.

**Figure S52.** Comparison of the calculated ECD spectrum of (2*S*, 5*R*, 6*R*, 8*S*, 13*S*, 14*S*)-**6** at the B3LYP/6-311+G(d, p) level with the experimental ECD spectrum of **1** in MeOH,  $\sigma = 0.39$  eV, shift = +9 nm.

**Figure S53.** Comparison of the calculated ECD spectrum of (2*S*, 5*R*, 6*R*, 13*S*, 14*S*, 15*S*)-**7** at the B3LYP/6-311+G(d, p) level with the experimental ECD spectrum of **1** in MeOH,  $\sigma = 0.34$  eV, shift = -2 nm.

**Table S1.** Reported literatures about harziane type diterpenes from 1992 to 2021.

| References | Publish year | Compound name                                                          | Sample source                            | Bioassays                                                              |
|------------|--------------|------------------------------------------------------------------------|------------------------------------------|------------------------------------------------------------------------|
| [1]        | 1992         | harziandione                                                           | <i>Trichoderma harzianum</i> Rifai       | -                                                                      |
| [2]        | 1997         | isoharzandione                                                         | <i>Trichoderma viride</i>                | anti-fungal                                                            |
| [3]        | 2012         | harzianone                                                             | <i>Trichoderma longibrachiatum</i>       | anti-bacterial;<br>anti-fungal;<br>brine shrimp toxicity;              |
| [4]        | 2013         | trichodermaerin                                                        | <i>Trichoderma erinaceum</i>             | cytotoxic                                                              |
| [5]        | 2014         | compounds <b>2</b> ; <b>3</b> ; <b>4</b>                               | <i>Trichoderma atroviridae</i>           | anti-bacterial;<br>cytotoxic                                           |
| [6]        | 2016         | (9 <i>R</i> ,10 <i>R</i> )-dihydro-harzianelactone;<br>hazrianelactone | <i>Trichoderma</i> sp.<br>Xy24           | cytotoxic                                                              |
| [7]        | 2017         | harzianols A–E;<br>harziane acid                                       | microbial transformation                 | cytotoxicity;<br>anti-inflammatory;<br>anti-HIV                        |
| [8]        | 2017         | furanharzianones A and B                                               | microbial transformation                 | cytotoxicity;<br>anti-inflammatory;<br>anti-HIV                        |
| [9]        | 2018         | 3 <i>R</i> -hydroxy-9 <i>R</i> ,10 <i>R</i> -dihydroharzianone         | <i>Trichoderma harzianum</i> X-5         | anti- plankton activities                                              |
| [10]       | 2018         | 11-hydroxy-9-harzien-3-one                                             | <i>Trichoderma asperellum</i> cf44-2     | anti-bacterial;<br>anti- plankton activities                           |
| [11]       | 2019         | 3 <i>S</i> -hydroxyhazianone                                           | <i>Trichoderma asperellum</i> A-YMD-9-2  | anti- plankton activities                                              |
| [12]       | 2019         | harzianelactones A and B; harzianones A–D; harziane                    | <i>Trichoderma harzianum</i> XS-20090075 | phytotoxicity                                                          |
| [13]       | 2020         | harzianols F–J                                                         | <i>Trichoderma atroviridae</i> B7        | anti-bacterial;<br>cytotoxicity                                        |
| [14]       | 2020         | harzianone E                                                           | <i>Trichoderma harzianum</i> XS-20090075 | anti-bacterial;<br>anti-fungal; DNA Topo I inhibition; AChE inhibition |

|      |      |                                                                                                                                                      |                                              |                                           |
|------|------|------------------------------------------------------------------------------------------------------------------------------------------------------|----------------------------------------------|-------------------------------------------|
| [15] | 2020 | heteroscyphic acid A                                                                                                                                 | <i>Heteroscyphus coalitus</i>                | anti-fungal                               |
| [16] | 2020 | harziandione A                                                                                                                                       | <i>Trichoderma erinaceum</i> F1-1            | cytotoxic                                 |
| [17] | 2021 | deoxytrichodermaerin                                                                                                                                 | <i>Trichoderma longibrachiatum</i> A-WH-20-2 | anti-fungal;<br>anti- plankton activities |
| [18] | 2021 | 3 <i>S</i> -hydroxy-9 <i>R</i> ,10 <i>R</i> -dihydroharzianone; 3 <i>S</i> -hydroxytrichodermaerin; methyl 3 <i>S</i> -hydroxy-10,11-seco-harzianate | <i>Trichoderma asperelloides</i> RR-dl-6-11  | anti- plankton activities                 |

---

1. Ghisalberti, E.L.; Hockless, D.C.R.; Rowland, C.; White, A.H. Harziandione, a New Class of Diterpene from *Trichoderma harzianum*. *Journal of Natural Products* **1992**, *55*, 1690-1694, doi:10.1021/np50089a023.

2. Mannina, L.; Segre, A.L.; Ritieni, A.; Fogliano, V.; Vinale, F.; Randazzo, G.; Maddau, L.; Bottalico, A. A new fungal growth inhibitor from *Trichoderma viride*. *Tetrahedron* **1997**, *53*, 3135-3144, doi:https://doi.org/10.1016/S0040-4020(97)00024-0.

3. Miao, F.; Liang, X.; Yin, X.L.; Wang, G.; Ji, N.Y. Absolute configurations of unique harziane diterpenes from *Trichoderma* species. *Organic letters* **2012**, *14* 15, 3815-3817.

4. Xie, Z.L.; Li, H.J.; Wang, L.Y.; Liang, W.L.; Liu, W.; Lan, W.J. Trichodermaerin, a New Diterpenoid Lactone from the Marine Fungus *Trichoderma erinaceum* Associated with the Sea Star *Acanthaster planci*. *Natural Product Communications* **2013**, *8*, 1934578X1300800116, doi:10.1177/1934578X1300800116.

5. Adelin, E.; Servy, C.; Martin, M.T.; Arcile, G.; Iorga, B.I.; Retailleau, P.; Bonfill, M.; Ouazzani, J. Bicyclic and tetracyclic diterpenes from a *Trichoderma* symbiont of *Taxus baccata*. *Phytochemistry* **2014**, *97*, 55-61, doi:https://doi.org/10.1016/j.phytochem.2013.10.016.

6. Zhang, M.; Liu, J.M.; Zhao, J.L.; Li, N.; Chen, R.D.; Xie, K.B.; Zhang, W.J.; Feng, K.P.; Yan, Z.; Wang, N.; et al. Two new diterpenoids from the endophytic fungus *Trichoderma* sp. Xy24 isolated from mangrove plant *Xylocarpus granatum*. *Chinese Chemical Letters* **2016**, *27*, 957-960, doi:<https://doi.org/10.1016/j.cclet.2016.02.008>.
7. Zhang, M.; Liu, J.; Chen, R.; Zhao, J.; Xie, K.; Chen, D.; Feng, K.; Dai, J. Microbial oxidation of harzianone by *Bacillus* sp. IMM-006. *Tetrahedron* **2017**, *73*, 7195-7199, doi:<https://doi.org/10.1016/j.tet.2017.11.002>.
8. Zhang, M.; Liu, J.; Chen, R.; Zhao, J.; Xie, K.; Chen, D.; Feng, K.; Dai, J. Two Furanharzianones with 4/7/5/6/5 Ring System from Microbial Transformation of Harzianone. *Organic Letters* **2017**, *19*, 1168-1171, doi:10.1021/acs.orglett.7b00204.
9. Song, Y.P.; Fang, S.T.; Miao, F.P.; Yin, X.L.; Ji, N.Y. Diterpenes and Sesquiterpenes from the Marine Algicolous Fungus *Trichoderma harzianum* X-5. *Journal of Natural Products* **2018**, *81*, 2553-2559, doi:10.1021/acs.jnatprod.8b00714.
10. Song, Y.P.; Liu, X.H.; Shi, Z.Z.; Miao, F.P.; Fang, S.T.; Ji, N.Y. Bisabolane, cyclonerane, and harziane derivatives from the marine-alga-endophytic fungus *Trichoderma asperellum* cf44-2. *Phytochemistry* **2018**, *152*, 45-52, doi:<https://doi.org/10.1016/j.phytochem.2018.04.017>.
11. Song, Y.P.; Miao, F.P.; Liang, X.R.; Yin, X.L.; Ji, N.Y. Harziane and cadinane terpenoids from the alga-endophytic fungus *Trichoderma asperellum* A-YMD-9-2. *Phytochemistry Letters* **2019**, *32*, 38-41, doi:<https://doi.org/10.1016/j.phytol.2019.05.001>.
12. Zhao, D.L.; Yang, L.J.; Shi, T.; Wang, C.Y.; Shao, C.L.; Wang, C.Y. Potent Phytotoxic Harziane Diterpenes from a Soft Coral-Derived Strain of the Fungus *Trichoderma harzianum* XS-20090075. *Sci Rep* **2019**, *9*, 13345-13345, doi:10.1038/s41598-019-49778-7.
13. Li, W.Y.; Liu, Y.; Lin, Y.T.; Liu, Y.C.; Guo, K.; Li, X.N.; Luo, S.H.; Li, S.H. Antibacterial harziane diterpenoids from a fungal symbiont *Trichoderma atroviride* isolated from



Colquhounia coccinea var. mollis. *Phytochemistry* **2020**, *170*, 112198, doi:<https://doi.org/10.1016/j.phytochem.2019.112198>.

14. Shi, T.; Shao, C.L.; Liu, Y.; Zhao, D.L.; Cao, F.; Fu, X.M.; Yu, J.Y.; Wu, J.S.; Zhang, Z.K.; Wang, C.Y. Terpenoids From the Coral-Derived Fungus *Trichoderma harzianum* (XS-20090075) Induced by Chemical Epigenetic Manipulation. *Frontiers in Microbiology* **2020**, *11*, doi:10.3389/fmicb.2020.00572.

15. Wang, X.; Jin, X.Y.; Zhou, J.C.; Zhu, R.X.; Qiao, Y.N.; Zhang, J.Z.; Li, Y.; Zhang, C.Y.; Chen, W.; Chang, W.Q.; et al. Terpenoids from the Chinese liverwort *Heteroscyphus coalitus* and their anti-virulence activity against *Candida albicans*. *Phytochemistry* **2020**, *174*, 112324, doi:<https://doi.org/10.1016/j.phytochem.2020.112324>.

16. Guo, Y.W.; Gong, B.Q.; Yuan, J.; Li, H.J.; Mahmud, T.; Huang, Y.; Li, J.F.; Yang, D.P.; Lan, W.J. L-Phenylalanine Alters the Privileged Secondary Metabolite Production in the Marine-Derived Fungus *Trichoderma erinaceum* F1-1. *Journal of Natural Products* **2020**, *83*, 79-87, doi:10.1021/acs.jnatprod.9b00710.

17. Zou, J.X.; Song, Y.P.; Ji, N.Y. Deoxytrichodermaerin, a harziane lactone from the marine algicolous fungus *Trichoderma longibrachiatum* A-WH-20-2. *Natural Product Research* **2021**, *35*, 216-221, doi:10.1080/14786419.2019.1622110.

18. Zou, J.X.; Song, Y.P.; Zeng, Z.Q.; Ji, N.Y. Proharziane and Harziane Derivatives from the Marine Algicolous Fungus *Trichoderma asperelloides* RR-dl-6-11. *Journal of Natural Products* **2021**, *84*, 1414-1419, doi:10.1021/acs.jnatprod.1c00188.

**Table S2.**  $^1\text{H}$  NMR (600 MHz) and  $^{13}\text{C}$  NMR (150 MHz) data for compound **2** in DMSO- $d_6$ .

| <b>2</b> <sup>a</sup> |                            |                                  |
|-----------------------|----------------------------|----------------------------------|
| no.                   | $\delta_{\text{C}}$ , type | $\delta_{\text{H}}$ ( $J$ in Hz) |
| 1                     | 48.3, C                    |                                  |
| 2                     | 60.4, CH                   | 2.10, d (8.0)                    |
| 3                     | 213.2, C                   |                                  |
| 4 $\alpha$            | 42.7, CH <sub>2</sub>      | 2.80, dd (18.0, 11.0)            |
| 4 $\beta$             |                            | 1.94, d (18.0)                   |
| 5                     | 29.3, CH                   | 2.42, m                          |
| 6                     | 51.3, C                    |                                  |
| 7 $\alpha$            | 24.9, CH <sub>2</sub>      | 1.57-1.61, m <sup>b</sup>        |
| 7 $\beta$             |                            | 1.57-1.61, m <sup>b</sup>        |
| 8 $\alpha$            | 28.5, CH <sub>2</sub>      | 1.62-1.68, m <sup>b</sup>        |
| 8 $\beta$             |                            | 1.62-1.68, m <sup>b</sup>        |
| 9                     | 31.4, CH                   | 2.27, m                          |
| 10                    | 73.0, CH                   | 3.08, ddd (6.0, 4.0, 2.0)        |
| 11                    | 211.9, C                   |                                  |
| 12 $\alpha$           | 62.9, CH <sub>2</sub>      | 2.90, d (16.0)                   |
| 12 $\beta$            |                            | 2.52, d (16.0)                   |
| 13                    | 34.4, C                    |                                  |
| 14                    | 51.1, CH                   | 2.94, dd (11.0, 7.0)             |
| 15 $\alpha$           | 25.8, CH <sub>2</sub>      | 1.50, dd, (14.0, 7.0)            |
| 15 $\beta$            |                            | 2.00, m                          |
| 16                    | 24.7, CH <sub>3</sub>      | 1.00, s                          |
| 17                    | 22.7, CH <sub>3</sub>      | 0.88, s                          |
| 18                    | 20.5, CH <sub>3</sub>      | 1.04, d (7.0)                    |
| 19                    | 25.7, CH <sub>3</sub>      | 1.31, s                          |
| 20                    | 16.4, CH <sub>3</sub>      | 1.05, d (7.0)                    |

<sup>a</sup> Recorded in DMSO- $d_6$ <sup>b</sup> Overlapped signals

**Table S3.**  $^1\text{H}$  NMR (600 MHz) and  $^{13}\text{C}$  NMR (150 MHz) data for compound **3** in  $\text{DMSO-}d_6$ .

| <b>3<sup>a</sup></b> |                            |                                  |
|----------------------|----------------------------|----------------------------------|
| no.                  | $\delta_{\text{C}}$ , type | $\delta_{\text{H}}$ ( $J$ in Hz) |
| 1                    | 49.0, C                    |                                  |
| 2                    | 77.7, C                    |                                  |
| 2-OH                 |                            | 4.17, s                          |
| 3 $\alpha$           | 33.3, CH <sub>2</sub>      | 1.90, dd (7.0, 2.0)              |
| 3 $\beta$            |                            | 1.33, dd (7.0, 2.0)              |
| 4 $\alpha$           | 26.6, CH <sub>2</sub>      | 2.02, m                          |
| 4 $\beta$            |                            | 1.31, m                          |
| 5                    | 28.1, CH                   | 2.34, m                          |
| 6                    | 52.3, C                    |                                  |
| 7 $\alpha$           | 30.2, CH <sub>2</sub>      | 1.27, m                          |
| 7 $\beta$            |                            | 1.75, m                          |
| 8 $\alpha$           | 29.3, CH <sub>2</sub>      | 1.88, m                          |
| 8 $\beta$            |                            | 1.23, m                          |
| 9                    | 145.4, CH                  |                                  |
| 10                   | 149.7, CH                  |                                  |
| 11                   | 198.1, C                   |                                  |
| 12 $\alpha$          | 59.3, CH <sub>2</sub>      | 2.26, d (16.0)                   |
| 12 $\beta$           |                            | 2.59, d (16.0)                   |
| 13                   | 40.0, C                    |                                  |
| 14                   | 50.3, CH                   | 2.24, m                          |
| 15 $\alpha$          | 35.6, CH <sub>2</sub>      | 1.57, m                          |
| 15 $\beta$           |                            | 1.66, m                          |
| 16                   | 20.2, CH <sub>3</sub>      | 0.87, s                          |
| 17                   | 19.4, CH <sub>3</sub>      | 0.84, s                          |
| 18                   | 20.3, CH <sub>3</sub>      | 0.98, d (7.0)                    |
| 19                   | 21.4, CH <sub>3</sub>      | 1.39, s                          |
| 20                   | 21.9, CH <sub>3</sub>      | 2.00, s                          |

<sup>a</sup> Recorded in  $\text{DMSO-}d_6$

**Table S4.** Cartesian coordinates for the lowest-energy conformer of compound **1** in ECD calculation.

| <b>1</b>      |               |             | Standard Orientation (Ångstroms) |           |           |
|---------------|---------------|-------------|----------------------------------|-----------|-----------|
| Certer number | Atomic number | Atomic type | X                                | Y         | Z         |
| 1             | 6             | 0           | -3.200814                        | -0.946779 | -0.484074 |
| 2             | 6             | 0           | -2.455619                        | -1.072839 | 0.827777  |
| 3             | 6             | 0           | -1.170970                        | -1.926962 | 0.616800  |
| 4             | 6             | 0           | -0.020626                        | -0.899972 | 0.440157  |
| 5             | 6             | 0           | -0.728919                        | 0.487341  | 9.200864  |
| 6             | 6             | 0           | -1.275129                        | 0.643875  | -1.271668 |
| 7             | 6             | 0           | -2.378995                        | -0.395493 | -1.637567 |
| 8             | 6             | 0           | 1.191202                         | -1.346013 | -0.409723 |
| 9             | 6             | 0           | 2.415017                         | -0.424379 | -0.220429 |
| 10            | 6             | 0           | 2.592512                         | 0.909320  | -0.137078 |
| 11            | 6             | 0           | 1.439618                         | 1.882123  | -0.390498 |
| 12            | 6             | 0           | 0.221702                         | 1.656063  | 0.545624  |
| 13            | 6             | 0           | -1.706202                        | 2.063509  | -1.708725 |
| 14            | 8             | 0           | -4.366680                        | -1.285919 | -0.624501 |
| 15            | 6             | 0           | -1.934145                        | 0.345413  | 1.233207  |
| 16            | 1             | 0           | -1.492939                        | 0.328651  | 2.716943  |
| 17            | 8             | 0           | 9.431637                         | -0.782067 | 1.428931  |
| 18            | 8             | 0           | 1.862048                         | 3.244945  | -0.320560 |
| 19            | 6             | 0           | 3.932139                         | 1.490098  | 0.223117  |
| 20            | 6             | 0           | 2.032967                         | -2.486776 | 0.294443  |
| 21            | 6             | 0           | 3.254545                         | -1.560589 | 0.234043  |
| 22            | 8             | 0           | 4.435074                         | -1.722161 | 0.490767  |
| 23            | 6             | 0           | -3.043998                        | 1.413075  | 1.147692  |
| 24            | 6             | 0           | 0.964497                         | -1.749074 | -1.879736 |
| 25            | 1             | 0           | -3.135298                        | -1.495046 | 1.572832  |
| 26            | 1             | 0           | -0.993018                        | -2.566234 | 1.485748  |
| 27            | 1             | 0           | -1.272502                        | -2.600070 | -0.239923 |
| 28            | 1             | 0           | -0.430753                        | 0.419927  | -1.923031 |
| 29            | 1             | 0           | -1.911158                        | -1.272428 | -2.104012 |
| 30            | 1             | 0           | -3.069586                        | 0.004867  | -2.384869 |
| 31            | 1             | 0           | 1.130190                         | 1.758036  | -1.433237 |
| 32            | 1             | 0           | 0.602205                         | 1.527973  | 1.565122  |
| 33            | 1             | 0           | -0.339514                        | 2.595474  | 0.537562  |
| 34            | 1             | 0           | -1.949125                        | 2.038189  | -2.776257 |
| 35            | 1             | 0           | -0.904843                        | 2.795768  | -1.583446 |
| 36            | 1             | 0           | -2.583831                        | 2.443284  | -1.185801 |
| 37            | 1             | 0           | -1.127231                        | 1.311289  | 3.030726  |
| 38            | 1             | 0           | -2.359911                        | 0.092312  | 3.342159  |
| 39            | 1             | 0           | -0.720612                        | -0.406884 | 2.948302  |
| 40            | 1             | 0           | 1.954175                         | 3.482737  | 0.613086  |
| 41            | 1             | 0           | 4.665782                         | 0.702291  | 0.392396  |
| 42            | 1             | 0           | 4.284032                         | 2.150713  | -0.576423 |
| 43            | 1             | 0           | 3.863443                         | 2.111855  | 1.124098  |
| 44            | 1             | 0           | 2.116069                         | -3.438190 | -0.239099 |

|    |   |   |           |           |           |
|----|---|---|-----------|-----------|-----------|
| 45 | 1 | 0 | 1.736176  | -2.686582 | 1.329887  |
| 46 | 1 | 0 | -3.780557 | 1.232637  | 1.937965  |
| 47 | 1 | 0 | -2.640942 | 2.418887  | 1.302467  |
| 48 | 1 | 0 | -3.590781 | 1.410493  | 0.204245  |
| 49 | 1 | 0 | 0.189958  | -2.518495 | -1.962920 |
| 50 | 1 | 0 | 0.691388  | -0.914087 | -2.526480 |
| 51 | 1 | 0 | 1.886021  | -2.175119 | -2.289687 |

---

**Table S5.** Cartesian coordinates for the lowest-energy conformer of compound **4** in ECD calculation.

| <b>4</b>         |                  |                | Standard Orientation (Ångstroms) |           |           |
|------------------|------------------|----------------|----------------------------------|-----------|-----------|
| Certer<br>number | Atomic<br>number | Atomic<br>type | X                                | Y         | Z         |
| 1                | 6                | 0              | -2.895557                        | -0.650109 | -1.198349 |
| 2                | 6                | 0              | -2.240405                        | -1.424941 | 0.043002  |
| 3                | 6                | 0              | -0.860504                        | -1.988352 | 0.494456  |
| 4                | 6                | 0              | 0.192671                         | 0.956636  | -0.002170 |
| 5                | 6                | 0              | -0.646059                        | 0.294948  | 0.474791  |
| 6                | 6                | 0              | -1.112771                        | 1.181259  | -0.739520 |
| 7                | 6                | 0              | -1.941829                        | 0.400026  | -1.791353 |
| 8                | 6                | 0              | 1.480751                         | -0.786972 | -0.840763 |
| 9                | 6                | 0              | 2.581143                         | 0.014304  | -0.114399 |
| 10               | 6                | 0              | 2.604282                         | 1.117529  | 0.660935  |
| 11               | 6                | 0              | 1.367388                         | 1.942053  | 0.960250  |
| 12               | 6                | 0              | 0.157632                         | 1.134711  | 1.495720  |
| 13               | 6                | 0              | -1.781248                        | 2.535933  | -0.425160 |
| 14               | 6                | 0              | -1.879914                        | -0.461612 | 1.134448  |
| 15               | 6                | 0              | -1.501789                        | -1.285502 | 2.394016  |
| 16               | 6                | 0              | 3.880614                         | 1.565114  | 1.322155  |
| 17               | 6                | 0              | 2.442214                         | -2.041120 | -0.756816 |
| 18               | 6                | 0              | 3.550651                         | -1.098469 | 0.267643  |
| 19               | 8                | 0              | 4.744109                         | -1.250383 | -0.067434 |
| 20               | 6                | 0              | -3.051286                        | 0.428864  | 1.590417  |
| 21               | 6                | 0              | 1.365746                         | -0.384065 | -2.324231 |
| 22               | 8                | 0              | -1.431201                        | 3.409651  | -1.507889 |
| 23               | 8                | 0              | -3.133594                        | -2.435320 | 0.433310  |
| 24               | 1                | 0              | 0.590114                         | -1.355250 | 0.935319  |
| 25               | 1                | 0              | -3.175578                        | -1.364965 | -1.984621 |
| 26               | 1                | 0              | -3.829079                        | -0.199830 | -0.848293 |
| 27               | 1                | 0              | -0.699936                        | -2.964131 | -0.026602 |
| 28               | 1                | 0              | -0.831812                        | -2.147449 | -1.577114 |
| 29               | 1                | 0              | -0.195835                        | 1.496630  | -1.242483 |
| 30               | 1                | 0              | -2.495899                        | 1.116731  | -2.406956 |
| 31               | 1                | 0              | -1.259828                        | -0.106541 | -2.477572 |
| 32               | 1                | 0              | 1.085377                         | 2.517402  | 0.069839  |
| 33               | 1                | 0              | 1.633146                         | 2.688199  | 1.716626  |
| 34               | 1                | 0              | -0.513606                        | 1.843143  | 1.992589  |
| 35               | 1                | 0              | 0.525158                         | 0.473061  | 2.286701  |
| 36               | 1                | 0              | -1.437018                        | 2.958290  | 0.526395  |
| 37               | 1                | 0              | -2.872243                        | 2.445455  | 0.367394  |
| 38               | 1                | 0              | -1.192776                        | -0.627004 | 3.211017  |
| 39               | 1                | 0              | -2.381206                        | -1.838717 | 2.730957  |
| 40               | 1                | 0              | -0.708405                        | -2.017580 | 2.234315  |
| 41               | 1                | 0              | 4.714844                         | 0.900707  | 1.095715  |
| 42               | 1                | 0              | 4.135159                         | 2.580205  | 0.990168  |
| 43               | 1                | 0              | 3.746150                         | 1.622792  | 2.409831  |
| 44               | 1                | 0              | 2.634663                         | -2.584000 | -1.687066 |

|    |   |   |           |           |           |
|----|---|---|-----------|-----------|-----------|
| 45 | 1 | 0 | 2.163546  | -2.759331 | 0.022348  |
| 46 | 1 | 0 | -3.478264 | 1.050758  | 0.806959  |
| 47 | 1 | 0 | -3.857820 | -0.203815 | 1.974348  |
| 48 | 1 | 0 | -2.739526 | 1.089865  | 2.406000  |
| 49 | 1 | 0 | 0.964966  | 8.619250  | -2.473051 |
| 50 | 1 | 0 | 2.359253  | -0.401276 | -2.785164 |
| 51 | 1 | 0 | 0.742633  | -1.093672 | -2.877828 |
| 52 | 1 | 0 | -1.941538 | 4.223710  | -1.401063 |
| 53 | 1 | 0 | -3.389535 | -2.975992 | -0.327050 |

---

**Table S6.** Cartesian coordinates for the lowest-energy conformer of compound **5** in ECD calculation.

| <b>5</b>      |               |             | Standard Orientation (Ångstroms) |           |           |
|---------------|---------------|-------------|----------------------------------|-----------|-----------|
| Certer number | Atomic number | Atomic type | X                                | Y         | Z         |
| 1             | 6             | 0           | 3.139583                         | -0.802928 | 1.044662  |
| 2             | 6             | 0           | 2.433010                         | -1.366102 | -0.197260 |
| 3             | 6             | 0           | 1.127456                         | -2.090169 | 0.213954  |
| 4             | 6             | 0           | -0.011685                        | -1.067617 | -0.032927 |
| 5             | 6             | 0           | 0.709762                         | 0.321125  | -0.255939 |
| 6             | 6             | 0           | 1.223510                         | 0.993230  | 1.078281  |
| 7             | 6             | 0           | 2.199831                         | 0.083790  | 1.878149  |
| 8             | 6             | 0           | -1.295075                        | 1.203552  | 0.822707  |
| 9             | 6             | 0           | -2.489099                        | 0.459484  | 0.180522  |
| 10            | 6             | 0           | -2.631909                        | 0.775258  | 0.341830  |
| 11            | 6             | 0           | -1.483972                        | 1.754074  | -0.209548 |
| 12            | 6             | 0           | -0.221874                        | 1.300871  | -1.002342 |
| 13            | 6             | 0           | 1.718620                         | 2.456039  | 0.944001  |
| 14            | 8             | 0           | 1.947474                         | -0.191790 | -1.124412 |
| 15            | 6             | 0           | 1.545022                         | -0.744915 | -2.515549 |
| 16            | 1             | 0           | -1.895937                        | 3.051128  | -0.636278 |
| 17            | 8             | 0           | -3.869525                        | 1.198148  | -1.076872 |
| 18            | 8             | 0           | -2.067333                        | -2.551237 | 0.513954  |
| 19            | 6             | 0           | -3.259605                        | -1.711722 | 0.033166  |
| 20            | 6             | 0           | -4.384862                        | -2.000360 | -0.341037 |
| 21            | 6             | 0           | 3.062427                         | 0.830431  | -1.427841 |
| 22            | 8             | 0           | -1.191711                        | -1.008192 | 2.344496  |
| 23            | 6             | 0           | 0.602838                         | 3.352226  | 1.125125  |
| 24            | 6             | 0           | 3.284068                         | -2.308024 | -0.857895 |
| 25            | 1             | 0           | 0.398235                         | -1.292907 | -1.029992 |
| 26            | 1             | 0           | 3.482147                         | -1.646557 | 1.655198  |
| 27            | 1             | 0           | 4.039758                         | -0.255939 | 0.742323  |
| 28            | 1             | 0           | 0.997243                         | -2.980286 | -0.408263 |
| 29            | 1             | 0           | 1.178173                         | -2.435782 | 1.251113  |
| 30            | 1             | 0           | 0.360719                         | 1.111012  | 1.736613  |
| 31            | 1             | 0           | 2.782788                         | 0.693265  | 2.577136  |
| 32            | 1             | 0           | 1.593593                         | -0.575753 | 2.505316  |
| 33            | 1             | 0           | -1.229959                        | 1.808825  | 0.852665  |
| 34            | 1             | 0           | 0.327195                         | 2.214474  | -1.249833 |
| 35            | 1             | 0           | -0.544411                        | 0.867054  | -1.954262 |
| 36            | 1             | 0           | 2.191874                         | 2.666643  | -0.016606 |
| 37            | 1             | 0           | 2.462718                         | 2.649271  | 1.728057  |
| 38            | 1             | 0           | 1.173801                         | 0.056101  | -3.161618 |
| 39            | 1             | 0           | 2.429378                         | -1.172713 | -2.993821 |
| 40            | 1             | 0           | 0.791556                         | -1.533491 | -2.491114 |
| 41            | 1             | 0           | -1.204055                        | 3.636792  | -0.290104 |
| 42            | 1             | 0           | -3.613247                        | 1.566357  | -2.076873 |
| 43            | 1             | 0           | -4.579190                        | 0.374581  | -1.158234 |
| 44            | 1             | 0           | -4.345223                        | 2.037971  | -0.558452 |



|    |   |   |           |           |           |
|----|---|---|-----------|-----------|-----------|
| 45 | 1 | 0 | -2.259880 | 3.204275  | 1.370832  |
| 46 | 1 | 0 | -1.633983 | -3.150650 | -0.293806 |
| 47 | 1 | 0 | 3.530316  | 1.272766  | -0.549804 |
| 48 | 1 | 0 | 3.859288  | 0.338509  | -1.998370 |
| 49 | 1 | 0 | 2.686197  | 1.644762  | -2.055697 |
| 50 | 1 | 0 | -0.933556 | 0.013089  | 2.630615  |
| 51 | 1 | 0 | -2.154069 | -1.237050 | 2.814234  |
| 52 | 1 | 0 | 0.448794  | -1.684733 | 2.779385  |
| 53 | 1 | 0 | 0.954794  | 4.252559  | 1.097546  |
| 54 | 1 | 0 | 4.144758  | -1.885206 | -0.989744 |

---

**Table S7.** Cartesian coordinates for the lowest-energy conformer of compound **6** in ECD calculation.

| <b>6</b>      |               |             | Standard Orientation (Ångstroms) |           |           |
|---------------|---------------|-------------|----------------------------------|-----------|-----------|
| Certer number | Atomic number | Atomic type | X                                | Y         | Z         |
| 1             | 6             | 0           | 3.156936                         | -1.493092 | -0.772691 |
| 2             | 6             | 0           | -2.311323                        | -1.832164 | 0.464809  |
| 3             | 6             | 0           | -0.919213                        | -2.377734 | 0.035476  |
| 4             | 6             | 0           | 0.051964                         | -1.171699 | 0.163980  |
| 5             | 6             | 0           | -0.875952                        | 0.095867  | 0.323705  |
| 6             | 6             | 0           | -1.544188                        | 0.569242  | -1.029504 |
| 7             | 6             | 0           | -2.397771                        | -0.539920 | -1.713228 |
| 8             | 6             | 0           | 1.311032                         | -1.166073 | -0.737823 |
| 9             | 6             | 0           | 2.389485                         | -0.193352 | -0.206730 |
| 10            | 6             | 0           | 2.346177                         | 1.085835  | 0.217446  |
| 11            | 6             | 0           | 1.049803                         | 1.852722  | 0.066708  |
| 12            | 6             | 0           | 0.091561                         | 1.268083  | 0.951292  |
| 13            | 6             | 0           | -2.259114                        | 1.943843  | -0.974893 |
| 14            | 8             | 0           | -1.139851                        | -0.540732 | 1.279539  |
| 15            | 6             | 0           | -1.451408                        | -0.933100 | 2.682243  |
| 16            | 1             | 0           | 1.257750                         | 3.230527  | 0.372096  |
| 17            | 8             | 0           | 3.520328                         | 1.759382  | 0.864230  |
| 18            | 8             | 0           | 2.303197                         | -2.344860 | -0.371211 |
| 19            | 6             | 0           | 3.357893                         | -1.290731 | -0.005124 |
| 20            | 6             | 0           | 4.527057                         | -1.365743 | 0.337616  |
| 21            | 6             | 0           | -3.231855                        | 0.319131  | 1.571473  |
| 22            | 8             | 0           | 1.124224                         | -1.107345 | -2.263119 |
| 23            | 6             | 0           | -1.310287                        | 2.985820  | -1.286784 |
| 24            | 6             | 0           | 0.503659                         | -1.258694 | 1.156117  |
| 25            | 1             | 0           | -3.394088                        | -2.415206 | -1.318097 |
| 26            | 1             | 0           | -4.118974                        | -1.068181 | -0.469023 |
| 27            | 1             | 0           | -2.851971                        | -2.554320 | 1.088624  |
| 28            | 1             | 0           | -0.593887                        | -3.198492 | 0.682463  |
| 29            | 1             | 0           | -0.952255                        | -2.784011 | -0.980541 |
| 30            | 1             | 0           | -0.737272                        | 0.767552  | -1.737836 |
| 31            | 1             | 0           | -3.092286                        | -0.080480 | -2.425537 |
| 32            | 1             | 0           | 1.718726                         | -1.143233 | -2.322657 |
| 33            | 1             | 0           | 0.752013                         | 1.776854  | -0.982664 |
| 34            | 1             | 0           | 0.332236                         | 0.968617  | 1.915473  |
| 35            | 1             | 0           | -0.772808                        | 2.098960  | 1.159023  |
| 36            | 1             | 0           | -2.714508                        | 2.156550  | -0.006091 |
| 37            | 1             | 0           | -3.060233                        | 1.955562  | -1.725796 |
| 38            | 1             | 0           | -1.142148                        | -0.054405 | 3.257033  |
| 39            | 1             | 0           | -2.259170                        | -1.415727 | 3.242898  |
| 40            | 1             | 0           | -0.615436                        | -1.634372 | 2.667840  |
| 41            | 1             | 0           | 0.466674                         | 3.664904  | 0.015329  |
| 42            | 1             | 0           | 4.359212                         | 1.071275  | 0.970687  |
| 43            | 1             | 0           | 3.831973                         | 2.623854  | 0.267677  |
| 44            | 1             | 0           | 3.239679                         | 2.155884  | 1.846841  |

|    |   |   |           |           |            |
|----|---|---|-----------|-----------|------------|
| 45 | 1 | 0 | 2.571463  | -3.021742 | -1.188376  |
| 46 | 1 | 0 | 2.000919  | -2.942810 | 0.495200   |
| 47 | 1 | 0 | -3.794771 | 0.619211  | 0.689161   |
| 48 | 1 | 0 | -3.920707 | -0.251076 | 2.205389   |
| 49 | 1 | 0 | -2.963985 | 1.225621  | 2.125433   |
| 50 | 1 | 0 | 0.695090  | -0.164565 | -2 .607576 |
| 51 | 1 | 0 | 2.093582  | -1.217396 | -2 .760687 |
| 52 | 1 | 0 | 0.483936  | -1.923411 | -2.613517  |
| 53 | 1 | 0 | -1.801485 | 3.818555  | -1.309675  |

---

**Table S8.** Cartesian coordinates for the lowest-energy conformer of compound **7** in ECD calculation.

| <b>7</b>      |               |             | Standard Orientation (Ångstroms) |           |           |
|---------------|---------------|-------------|----------------------------------|-----------|-----------|
| Certer number | Atomic number | Atomic type | X                                | Y         | Z         |
| 1             | 6             | 0           | 2.945688                         | -0.386939 | 1.243321  |
| 2             | 6             | 0           | 2.357334                         | -0.886392 | -0.080131 |
| 3             | 6             | 0           | 1.024264                         | -1.668789 | 0.195375  |
| 4             | 6             | 0           | -0.096800                        | -0.630459 | -0.053332 |
| 5             | 6             | 0           | 0.629274                         | 0.769749  | -0.182686 |
| 6             | 6             | 0           | 1.008031                         | 1.370031  | 1.224075  |
| 7             | 6             | 0           | 1.915243                         | 0.421140  | 2.054918  |
| 8             | 6             | 0           | -1.410628                        | -0.798721 | 0.746012  |
| 9             | 6             | 0           | -2.575263                        | 0.020806  | 0.155477  |
| 10            | 6             | 0           | -2.695443                        | 1.270166  | -0.336382 |
| 11            | 6             | 0           | -1.551650                        | 2.265199  | -0.318156 |
| 12            | 6             | 0           | -0.241657                        | 1.766951  | -0.982399 |
| 13            | 6             | 0           | 1.526777                         | 2.825738  | 1.263108  |
| 14            | 8             | 0           | 1.927804                         | 0.308971  | -0.986980 |
| 15            | 6             | 0           | 1.622330                         | -0.187764 | -2.426826 |
| 16            | 1             | 0           | -0.420816                        | -0.843705 | -1.074345 |
| 17            | 8             | 0           | -3.976517                        | 1.728357  | -0.979335 |
| 18            | 8             | 0           | -2.212293                        | -2.099877 | 0.331279  |
| 19            | 6             | 0           | -3.401231                        | -1.198214 | -0.024086 |
| 20            | 6             | 0           | -4.553957                        | -1.428902 | -0.350411 |
| 21            | 6             | 0           | 3.037510                         | 1.362477  | -1.174055 |
| 22            | 8             | 0           | -1.369883                        | -0.732549 | 2.285082  |
| 23            | 6             | 0           | 0.887957                         | -2.782435 | -0.686150 |
| 24            | 6             | 0           | 3.297884                         | -1.721927 | -0.770772 |
| 25            | 1             | 0           | 3.262198                         | -1.255192 | 1.838118  |
| 26            | 1             | 0           | 3.848595                         | 0.196290  | 1.042899  |
| 27            | 1             | 0           | 1.017196                         | -2.045714 | 1.227958  |
| 28            | 1             | 0           | 0.064177                         | 1.423818  | 1.770835  |
| 29            | 1             | 0           | 2.432912                         | 0.996775  | 2.829872  |
| 30            | 1             | 0           | 1.280107                         | -0.286739 | 2.593601  |
| 31            | 1             | 0           | -1.364672                        | 2.583004  | 0.714525  |
| 32            | 1             | 0           | -1.874679                        | 3.166885  | -0.849033 |
| 33            | 1             | 0           | 0.359456                         | 2.650127  | -1.223439 |
| 34            | 1             | 0           | -0.510453                        | 1.317183  | -1.943351 |
| 35            | 1             | 0           | 1.524209                         | 3.164310  | 2.305103  |
| 36            | 1             | 0           | 0.887423                         | 3.513194  | 0.703184  |
| 37            | 1             | 0           | 2.544251                         | 2.947757  | 0.891375  |
| 38            | 1             | 0           | 1.274250                         | 0.637599  | -3.054373 |
| 39            | 1             | 0           | 2.547310                         | -0.565467 | -2.869882 |
| 40            | 1             | 0           | 0.893635                         | -0.995926 | -2.478464 |
| 41            | 1             | 0           | -4.732179                        | 0.942467  | -0.992608 |
| 42            | 1             | 0           | 4.376049                         | 2.596084  | -0.438244 |
| 43            | 1             | 0           | -3.786486                        | 2.067784  | -2.005608 |
| 44            | 1             | 0           | -2.385053                        | -2.841743 | 1.117069  |

|    |   |   |           |           |           |
|----|---|---|-----------|-----------|-----------|
| 45 | 1 | 0 | -1.802818 | -2.605798 | -0.548472 |
| 46 | 1 | 0 | 3.465907  | 1.740141  | -0.249098 |
| 47 | 1 | 0 | 3.856441  | 0.920727  | -1.750837 |
| 48 | 1 | 0 | 2.664197  | 2.220703  | -1.742180 |
| 49 | 1 | 0 | -1.094220 | 0.249115  | 2.672848  |
| 50 | 1 | 0 | -2.361913 | -0.965717 | 2.686660  |
| 51 | 1 | 0 | -0.675662 | -1.474317 | 2.693066  |
| 52 | 1 | 0 | 1.789713  | -2.931692 | -1.024894 |
| 53 | 1 | 0 | 3.840604  | -2.175130 | -0.109301 |

---

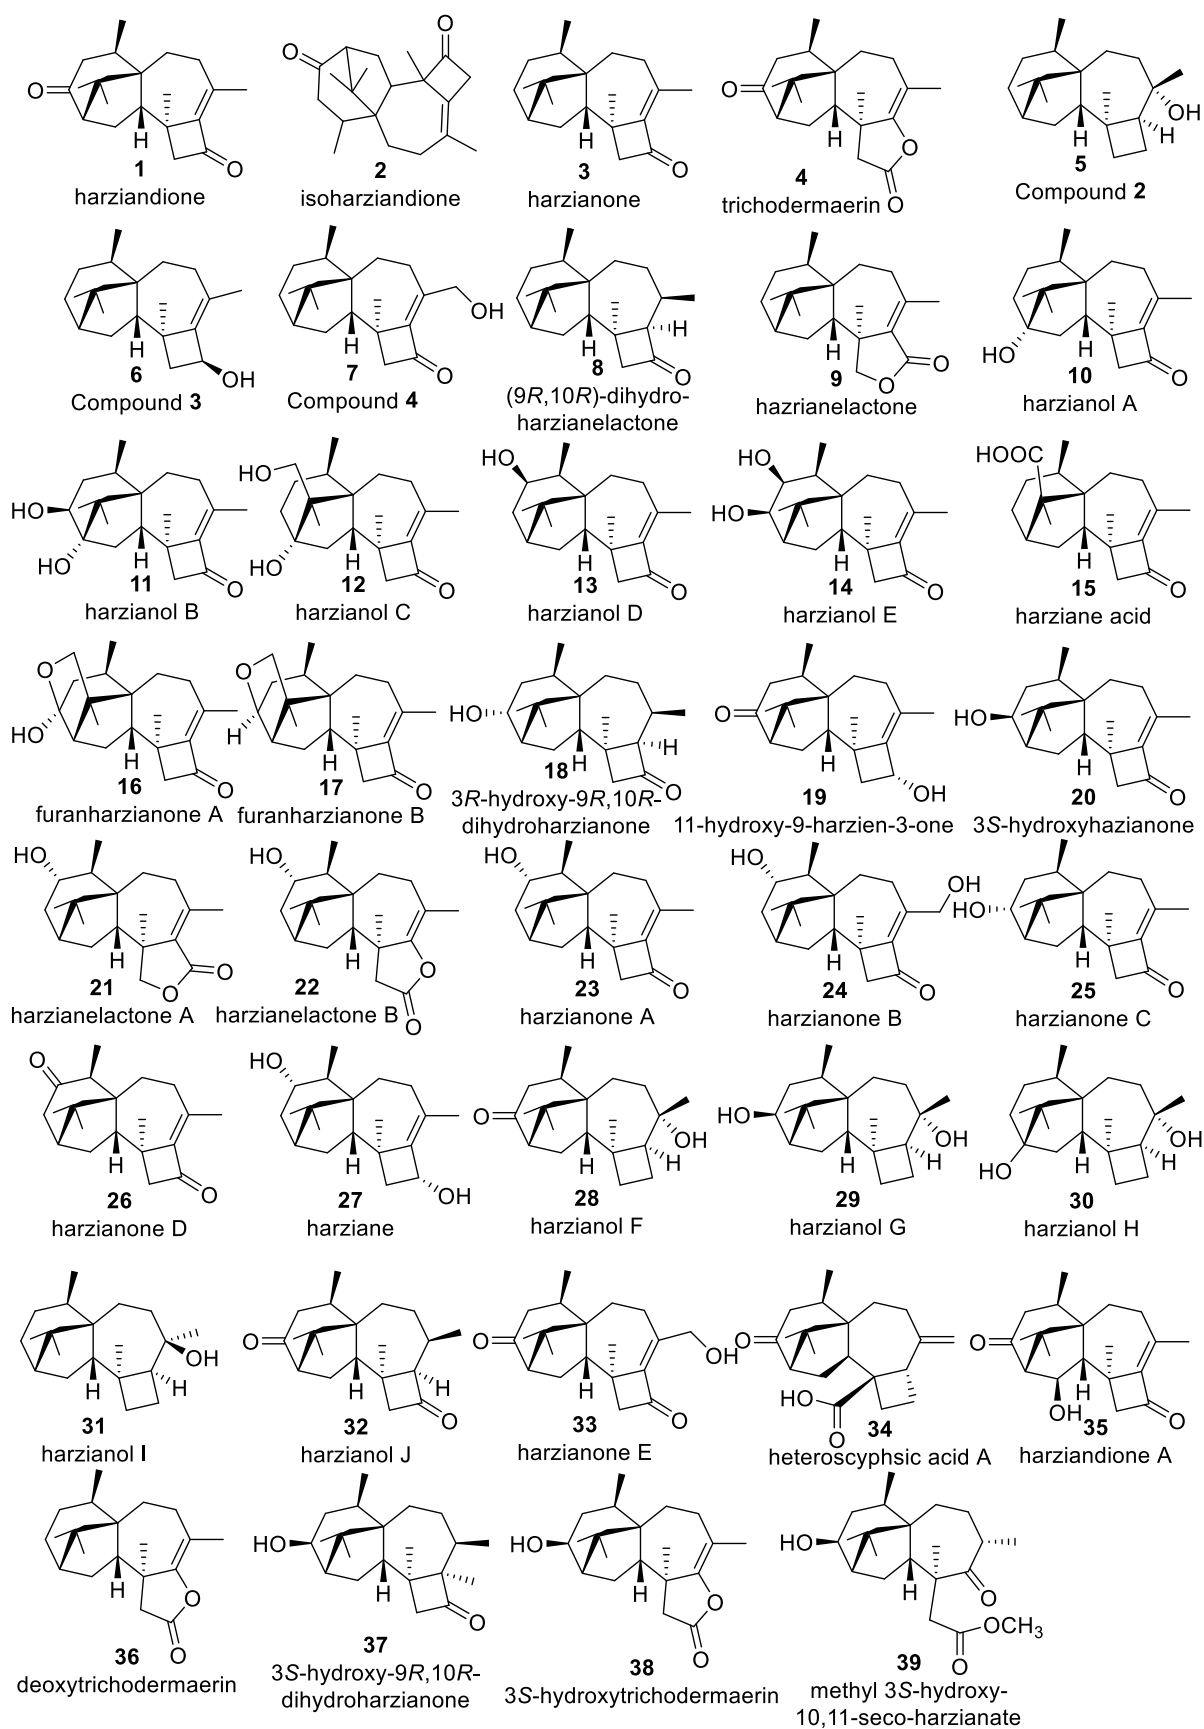

**Figure S1.** Reported compounds from previous literatures from 1992 to 2021.

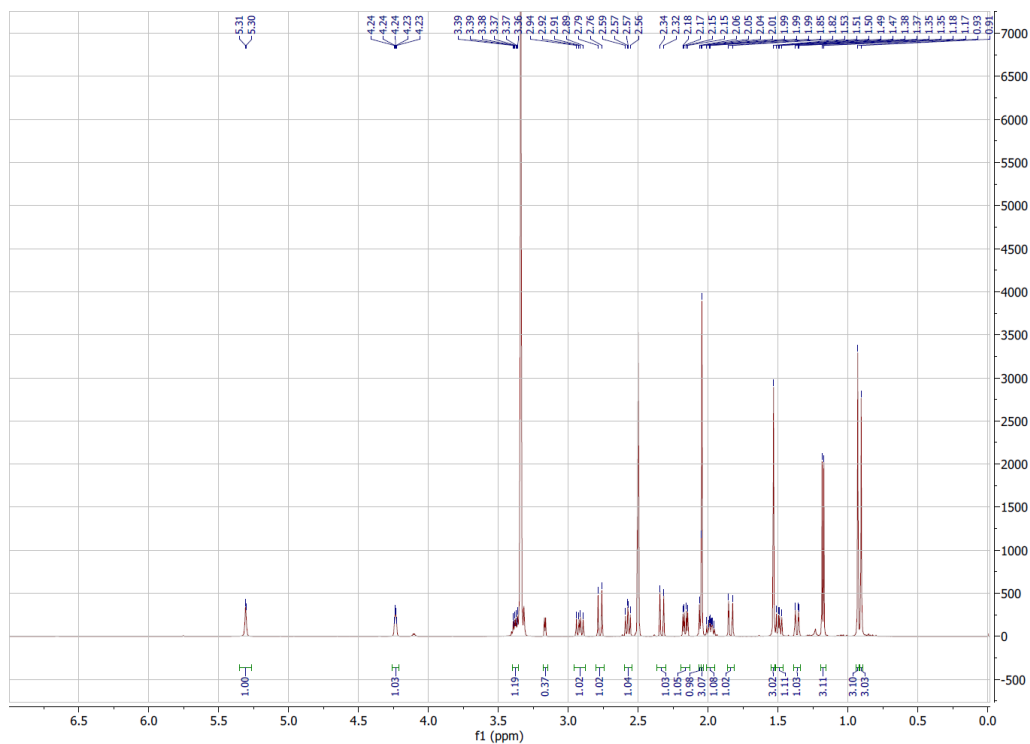

**Figure S2.**  $^1\text{H}$  NMR (600 MHz,  $\text{DMSO-}d_6$ ) spectrum of compound **1**, at 25°C.

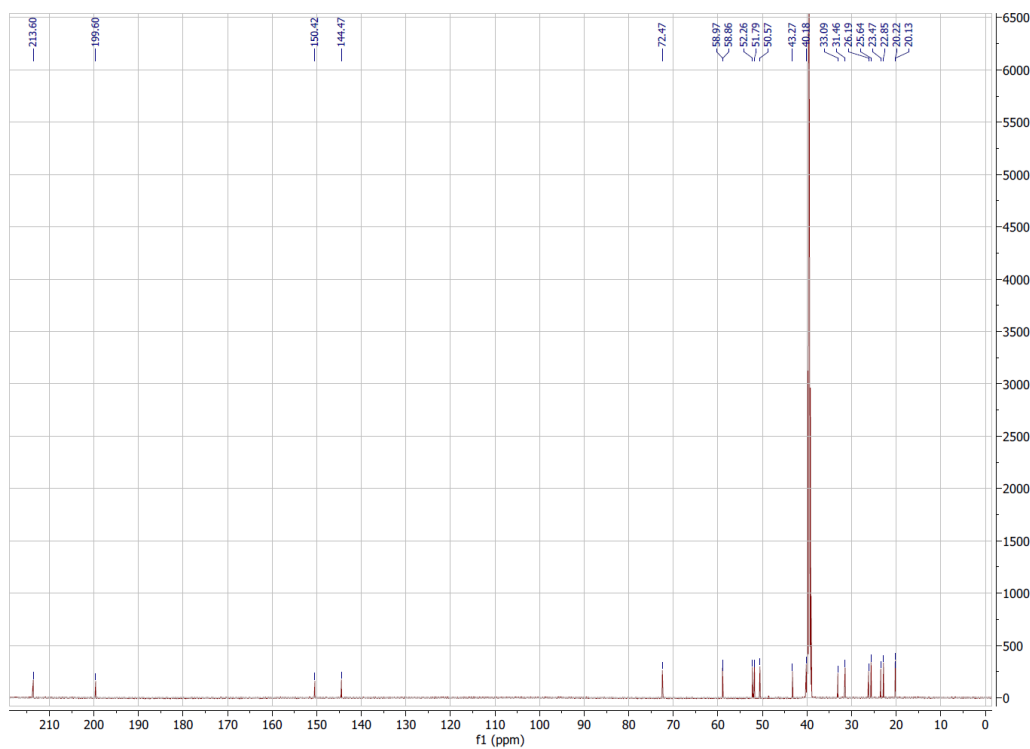

**Figure S3.**  $^{13}\text{C}$  NMR (150 MHz,  $\text{DMSO-}d_6$ ) spectrum of compound **1**, at 25°C.

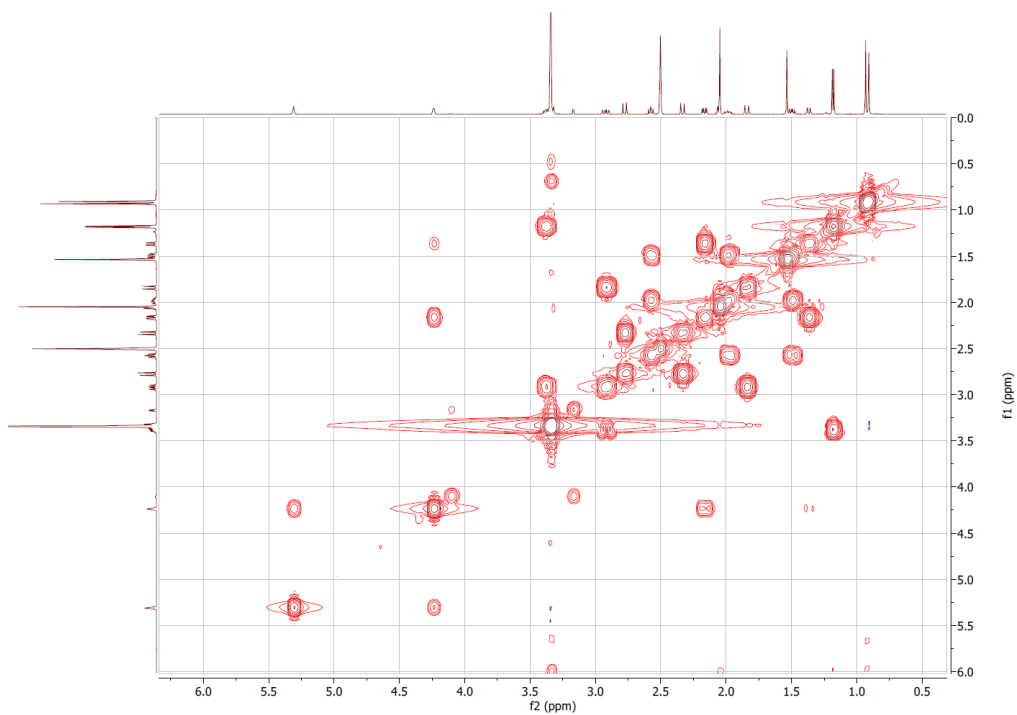

**Figure S4.**  $^1\text{H}$ - $^1\text{H}$  COSY ( $\text{DMSO-}d_6$ ) spectrum of compound **1**, at 25°C.

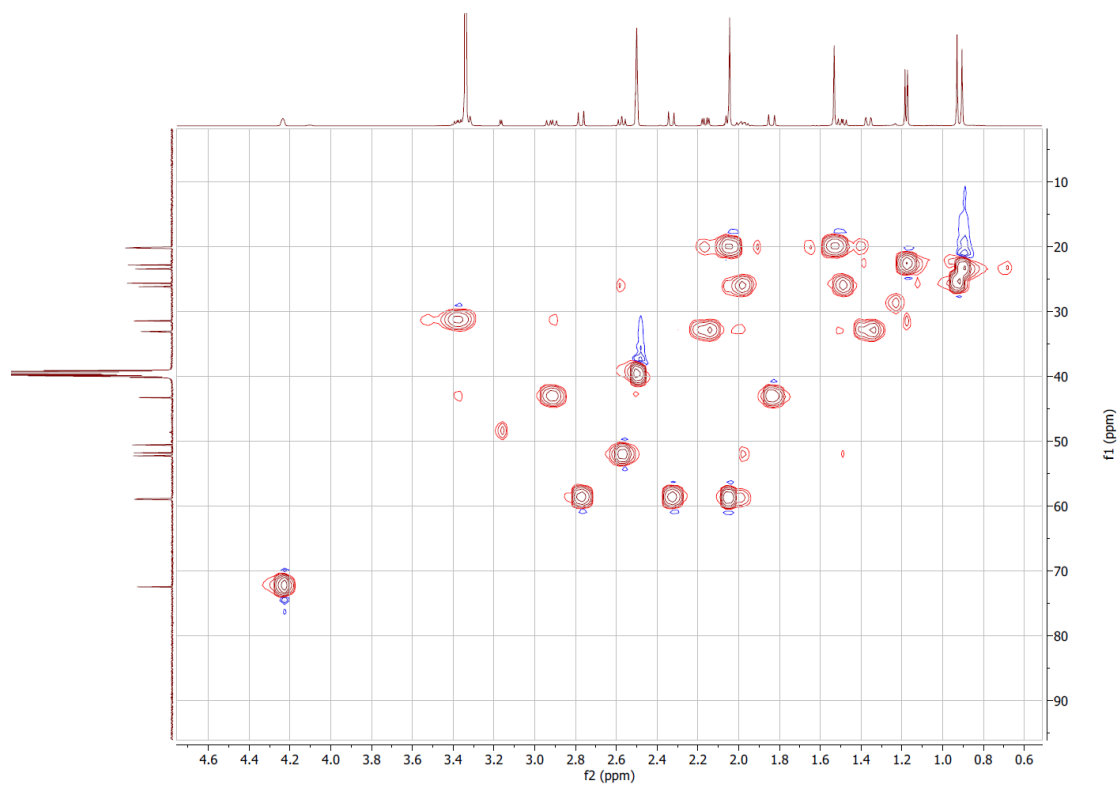

**Figure S5.** HSQC ( $\text{DMSO-}d_6$ ) spectrum of compound **1**, at 25°C.



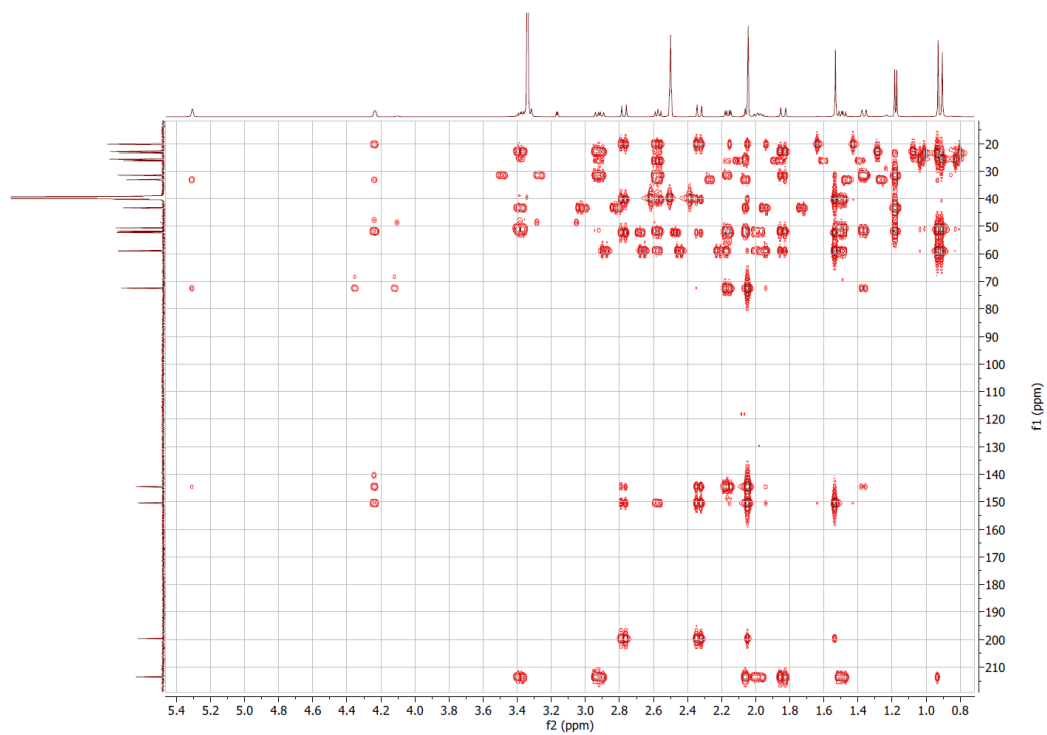

**Figure S6.** HMBC (DMSO-*d*<sub>6</sub>) spectrum of compound **1**, at 25°C.

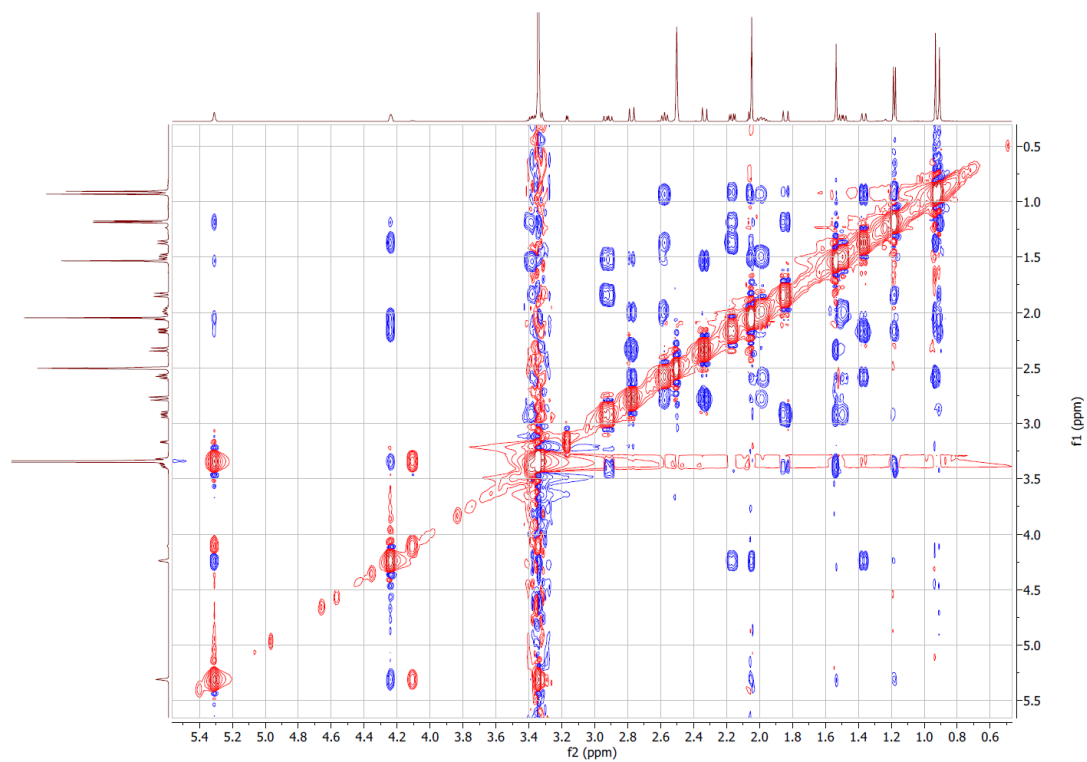

**Figure S7.** ROESY (DMSO-*d*<sub>6</sub>) spectrum of compound **1**, at 25°C.

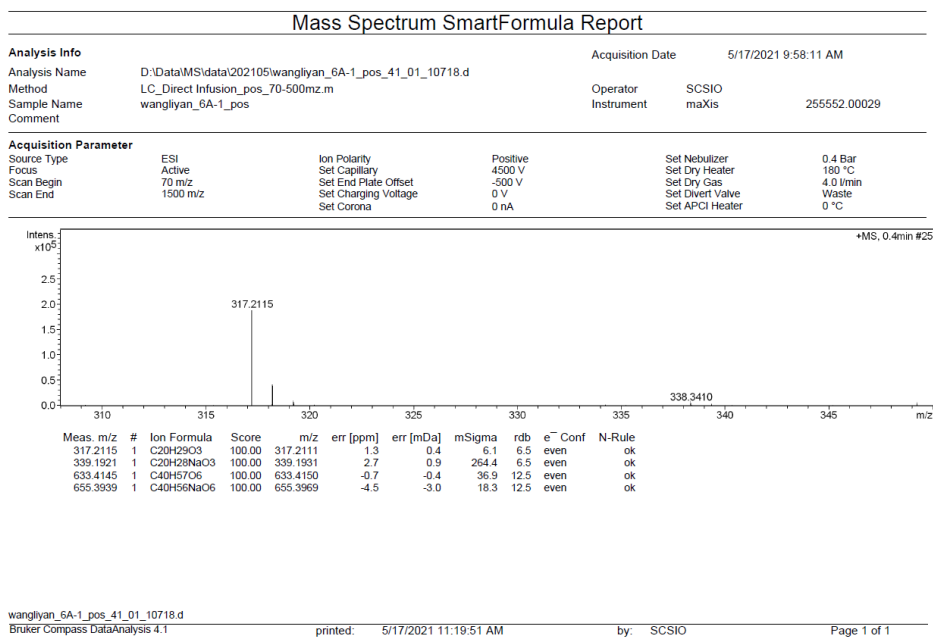

**Figure S8.** HRESIMS spectrum of compound **1**.

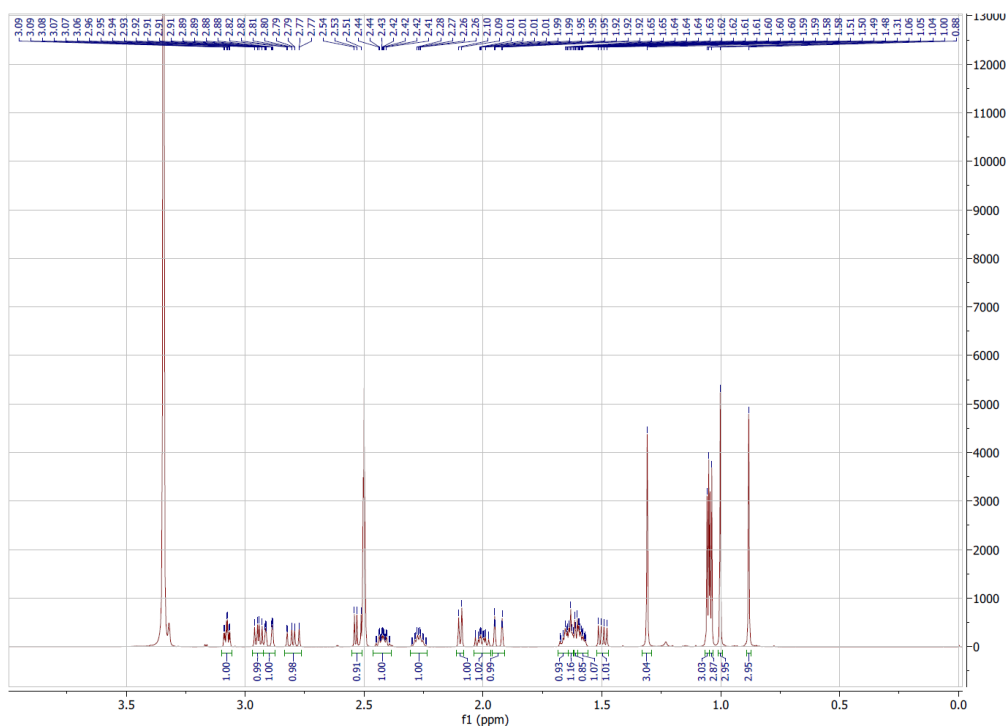

**Figure S9.** <sup>1</sup>H NMR (600 MHz, DMSO-*d*<sub>6</sub>) spectrum of compound **2**, at 25°C.

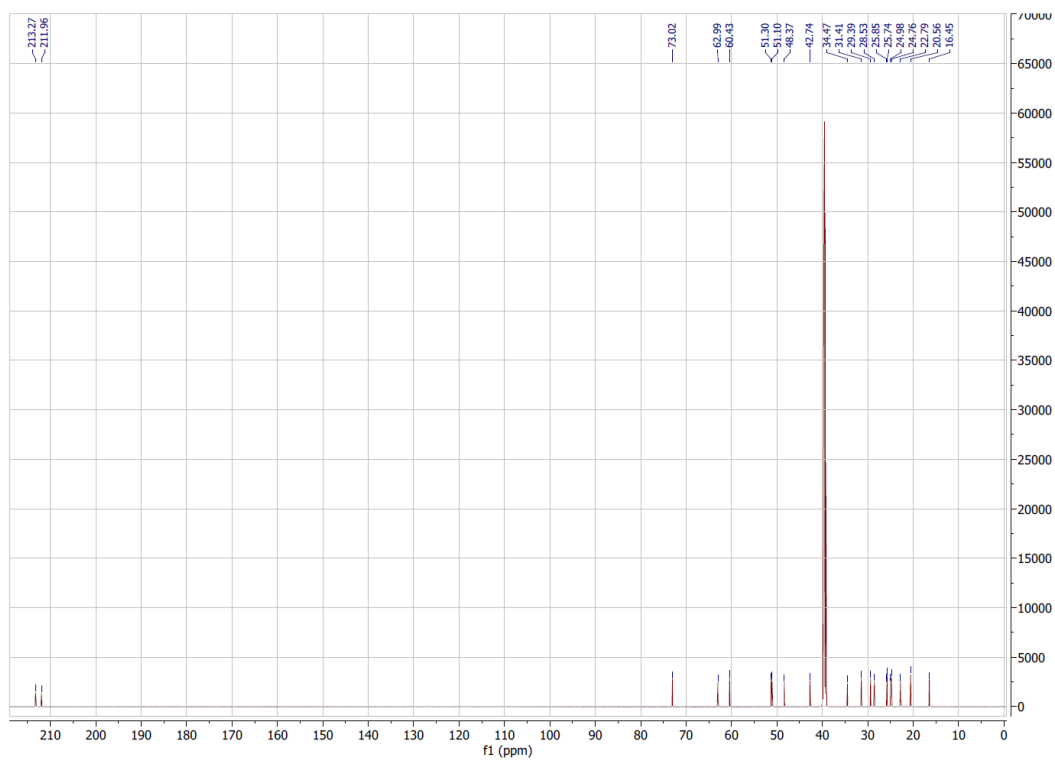

**Figure S10.**  $^{13}\text{C}$  NMR (150 MHz,  $\text{DMSO-}d_6$ ) spectrum of compound **2**, at 25°C.

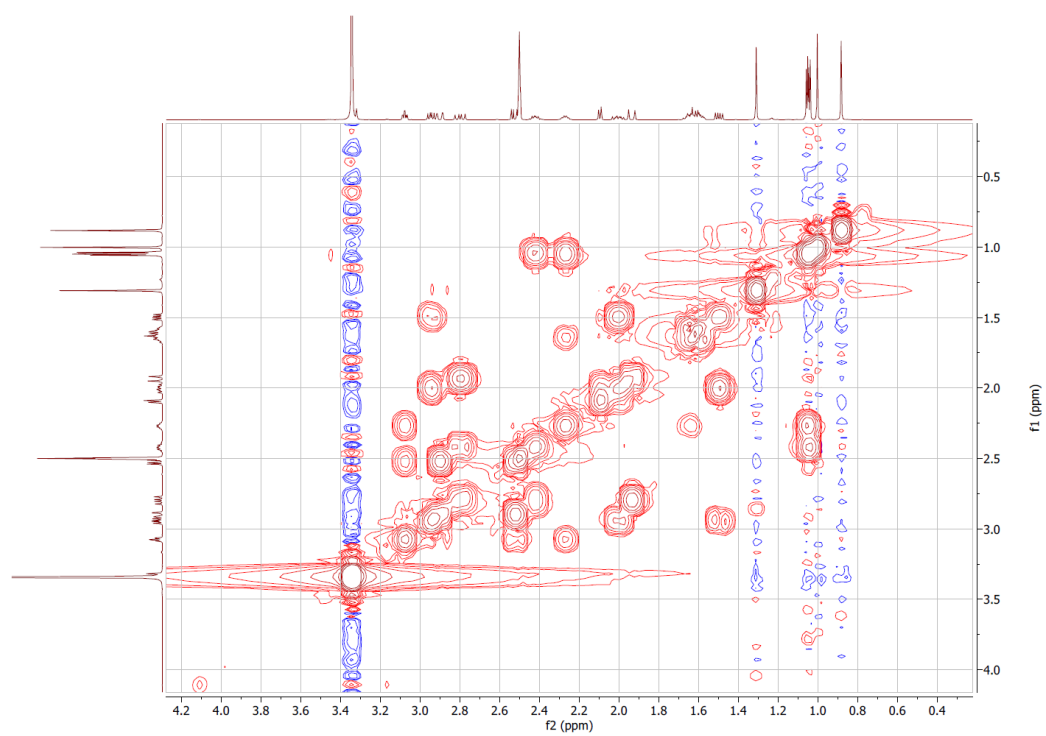

**Figure S11.**  $^1\text{H}$ - $^1\text{H}$  COSY ( $\text{DMSO-}d_6$ ) spectrum of compound **2**, at 25°C.

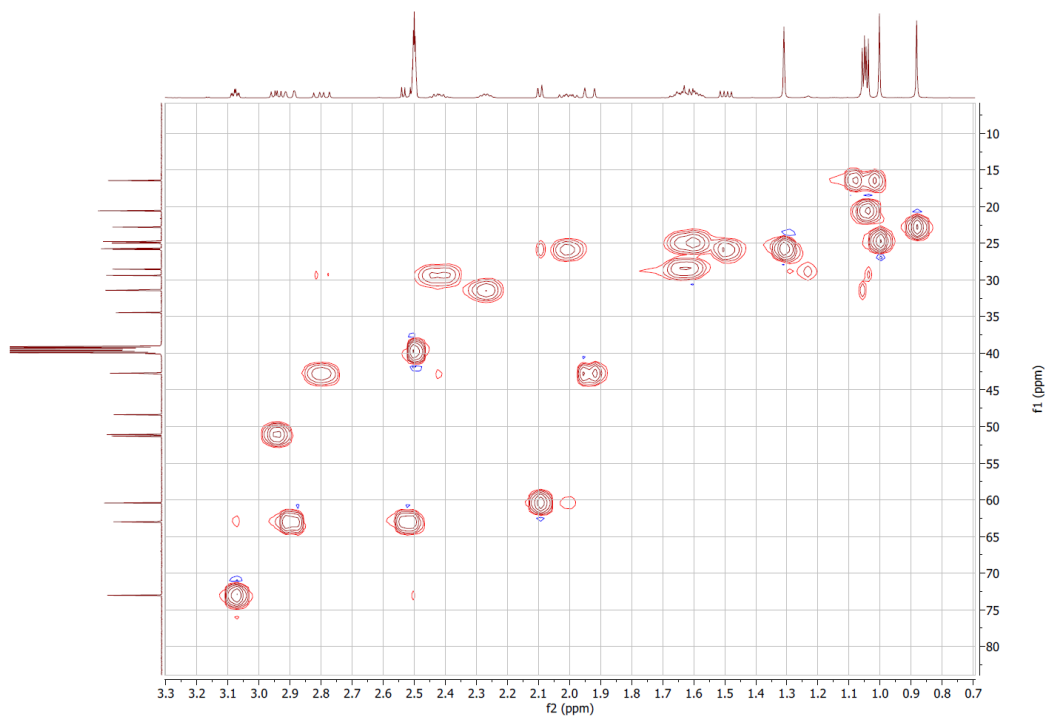

**Figure S12.** HSQC (DMSO-*d*<sub>6</sub>) spectrum of compound **2**, at 25°C.

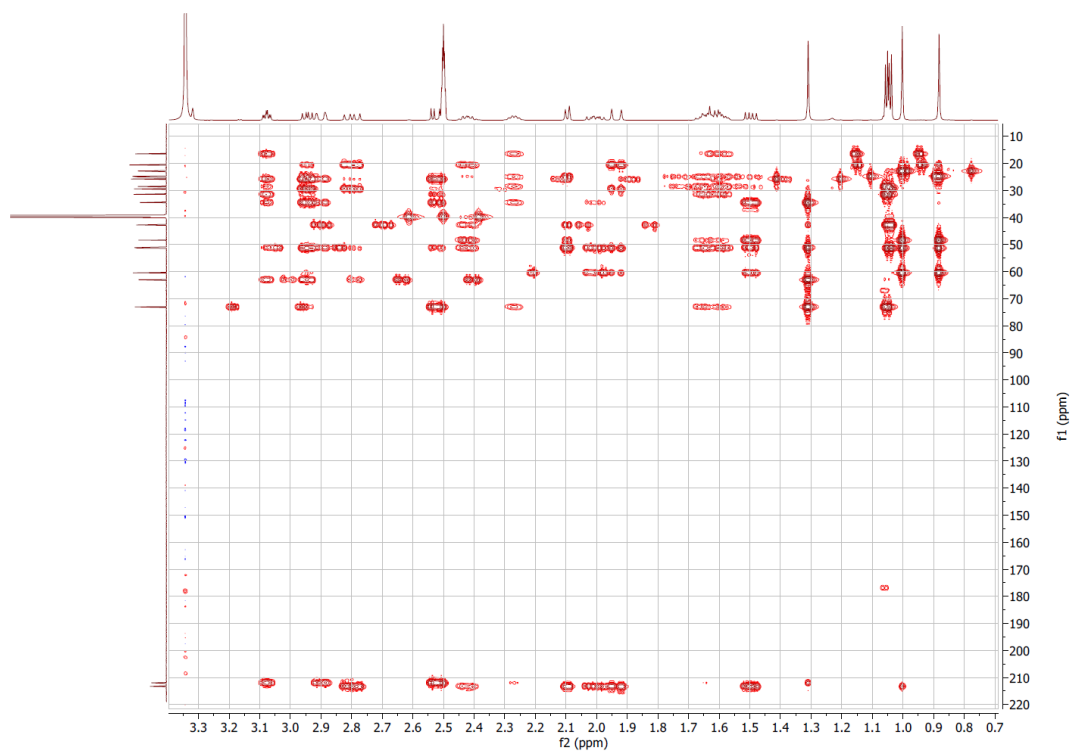

**Figure S13.** HMBC (DMSO-*d*<sub>6</sub>) spectrum of compound **2**, at 25°C.

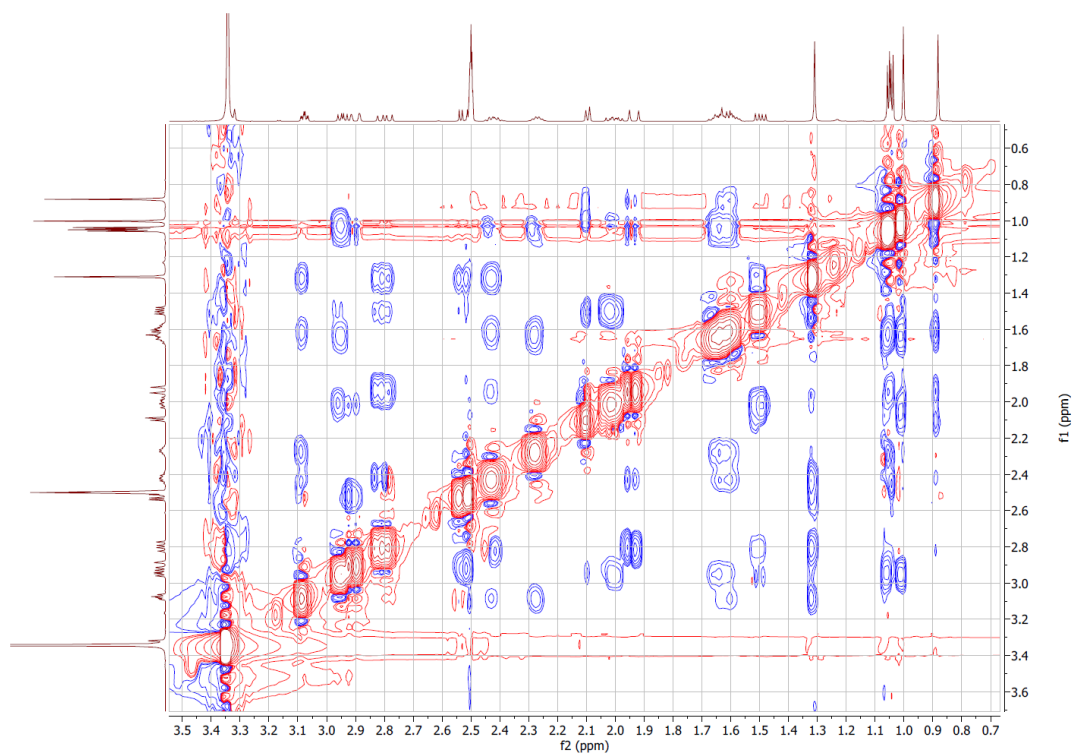

**Figure S14.** ROESY (DMSO-*d*<sub>6</sub>) spectrum of compound **2**, at 25°C.

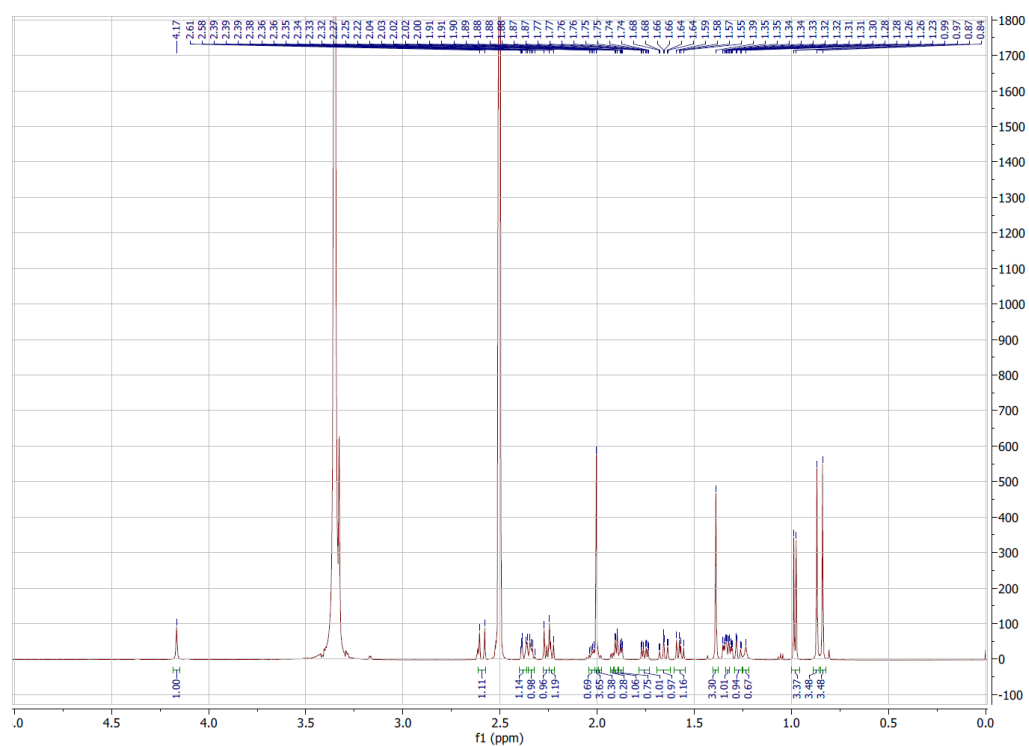

**Figure S15.** <sup>1</sup>H NMR (600 MHz, DMSO-*d*<sub>6</sub>) spectrum of compound **3**, at 25°C.

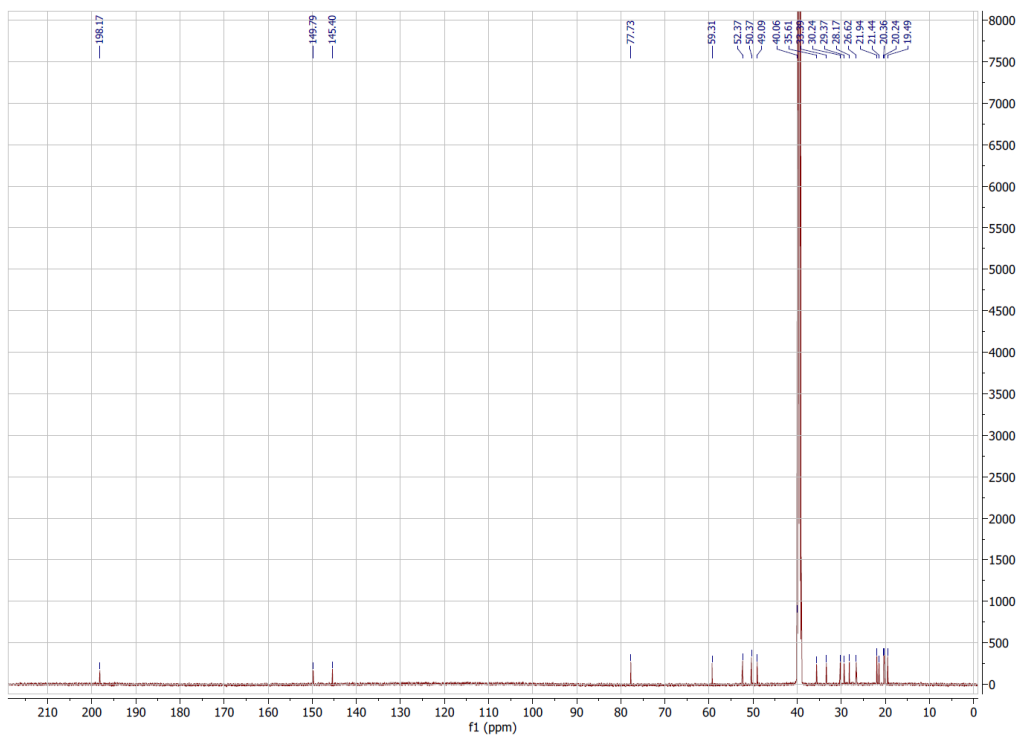

**Figure S16.**  $^{13}\text{C}$  NMR (150 MHz,  $\text{DMSO-}d_6$ ) spectrum of compound **3**, at 25°C.

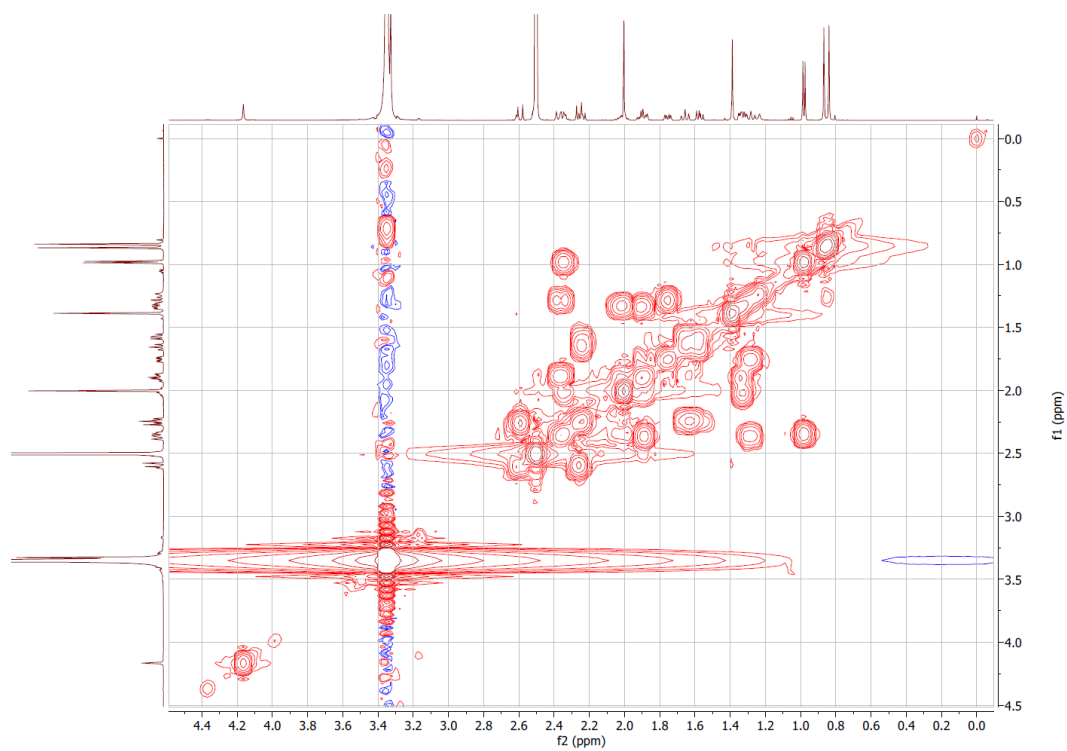

**Figure S17.**  $^1\text{H}$ - $^1\text{H}$  COSY ( $\text{DMSO-}d_6$ ) spectrum of compound **3**, at 25°C.

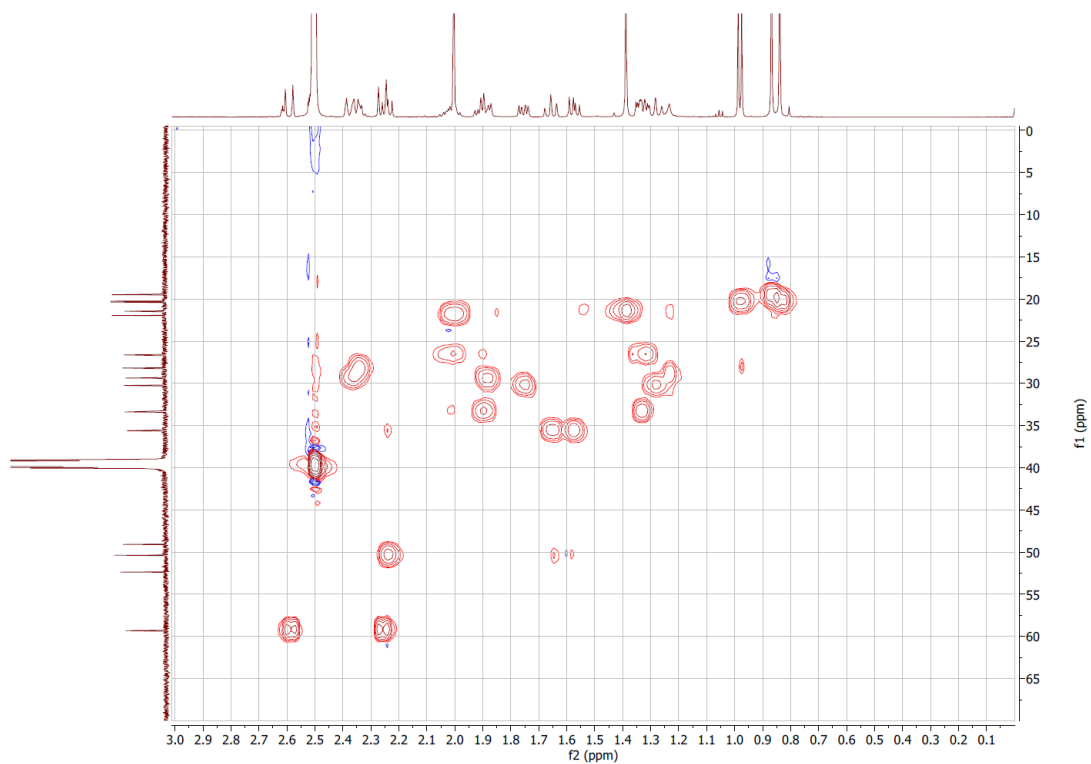

**Figure S18.** HSQC (DMSO-*d*<sub>6</sub>) spectrum of compound **3**, at 25°C.

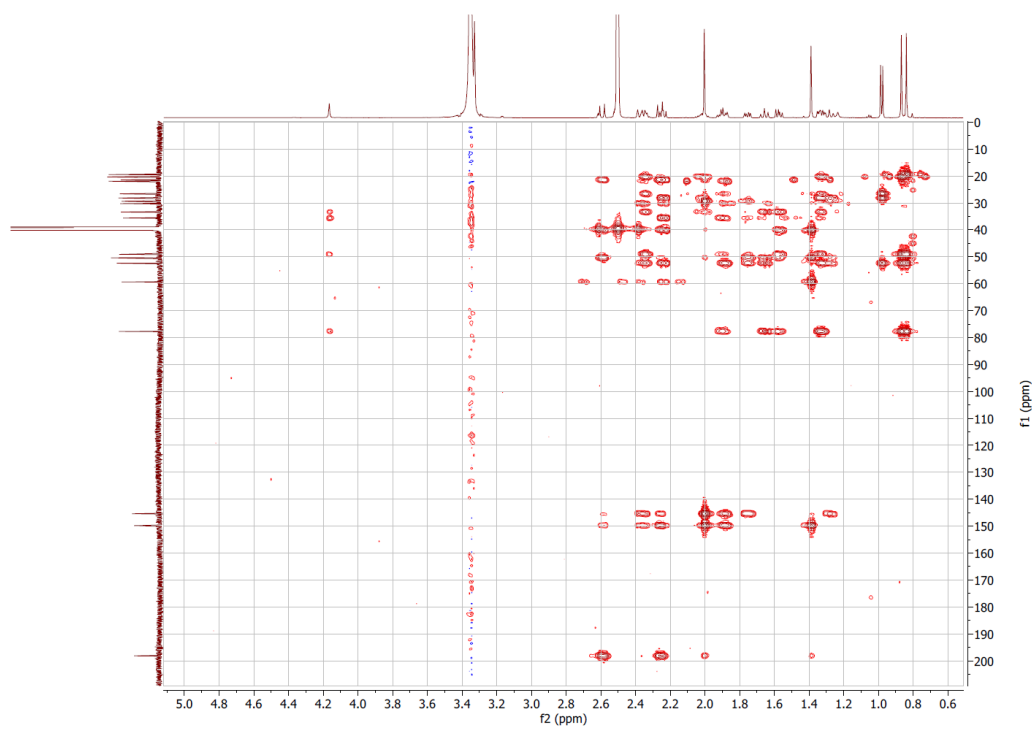

**Figure S19.** HMBC (DMSO-*d*<sub>6</sub>) spectrum of compound **3**, at 25°C.

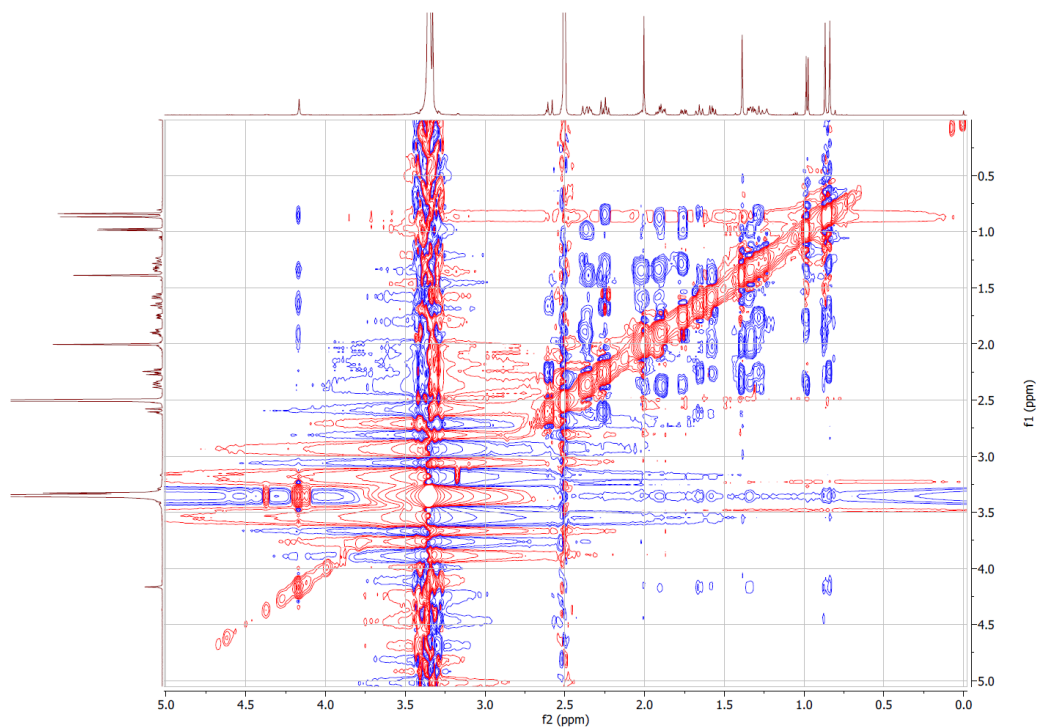

**Figure S20.** ROESY (DMSO- $d_6$ ) spectrum of compound **3**, at 25°C.

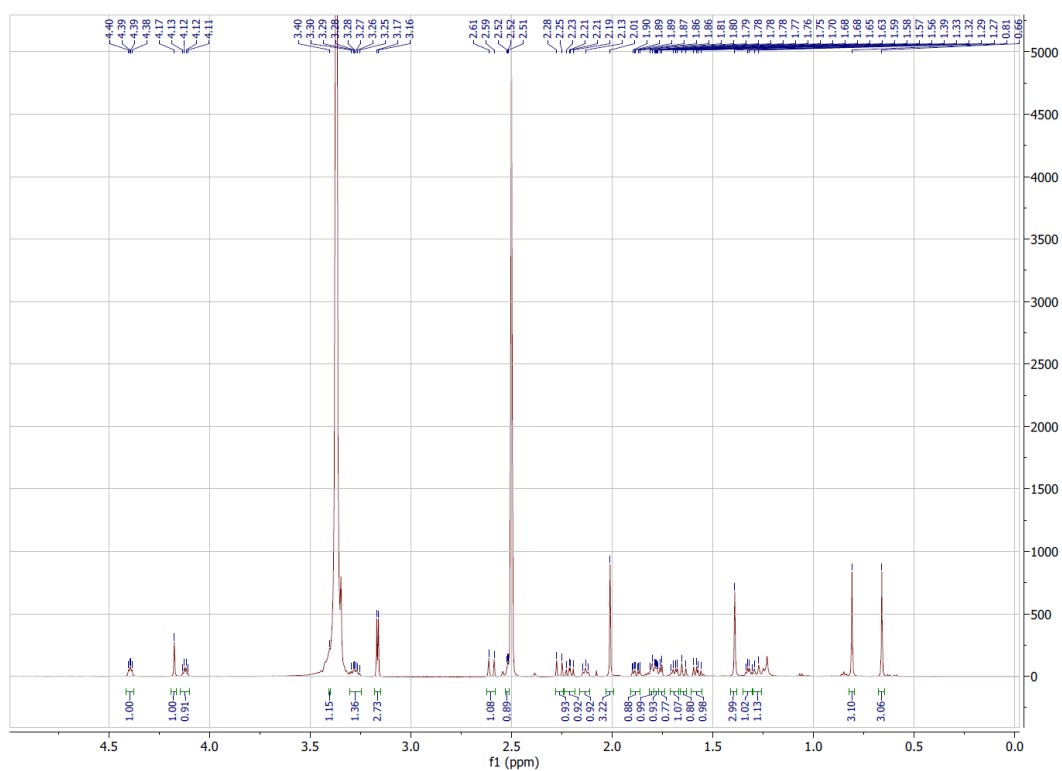

**Figure S21.**  $^1\text{H}$  NMR (600 MHz, DMSO- $d_6$ ) spectrum of compound **4**, at 25°C.



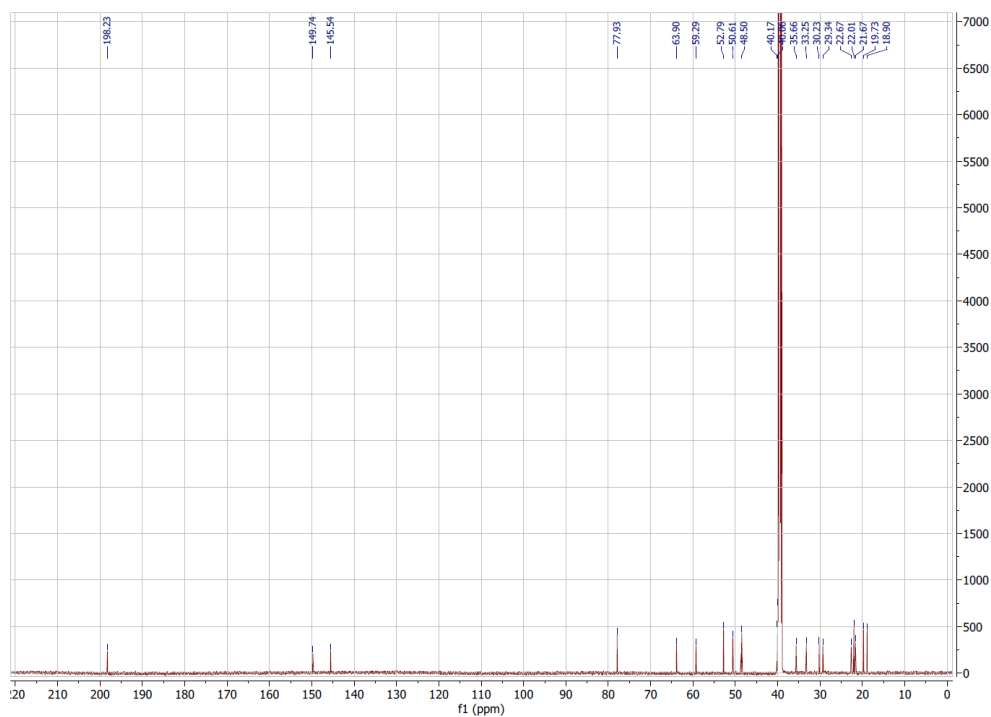

**Figure S22.**  $^{13}\text{C}$  NMR (150 MHz,  $\text{DMSO-}d_6$ ) spectrum of compound **4**, at 25°C.

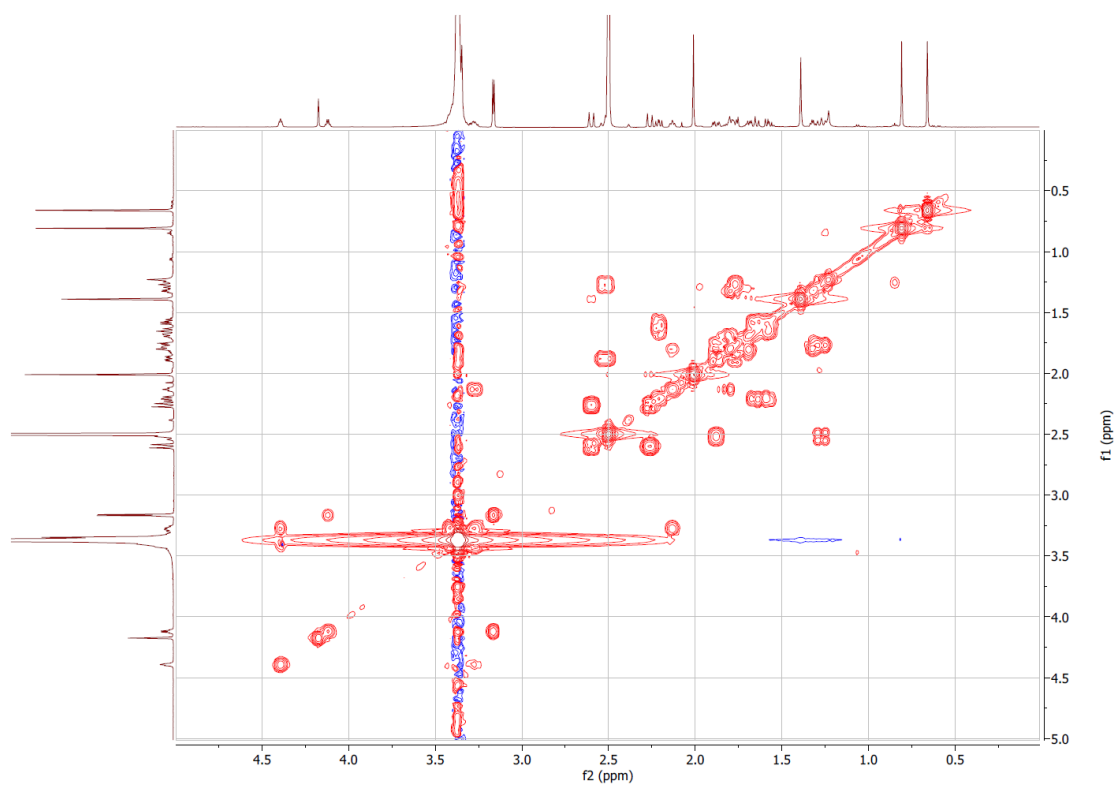

**Figure S23.**  $^1\text{H}$ - $^1\text{H}$  COSY ( $\text{DMSO-}d_6$ ) spectrum of compound **4**, at 25°C.

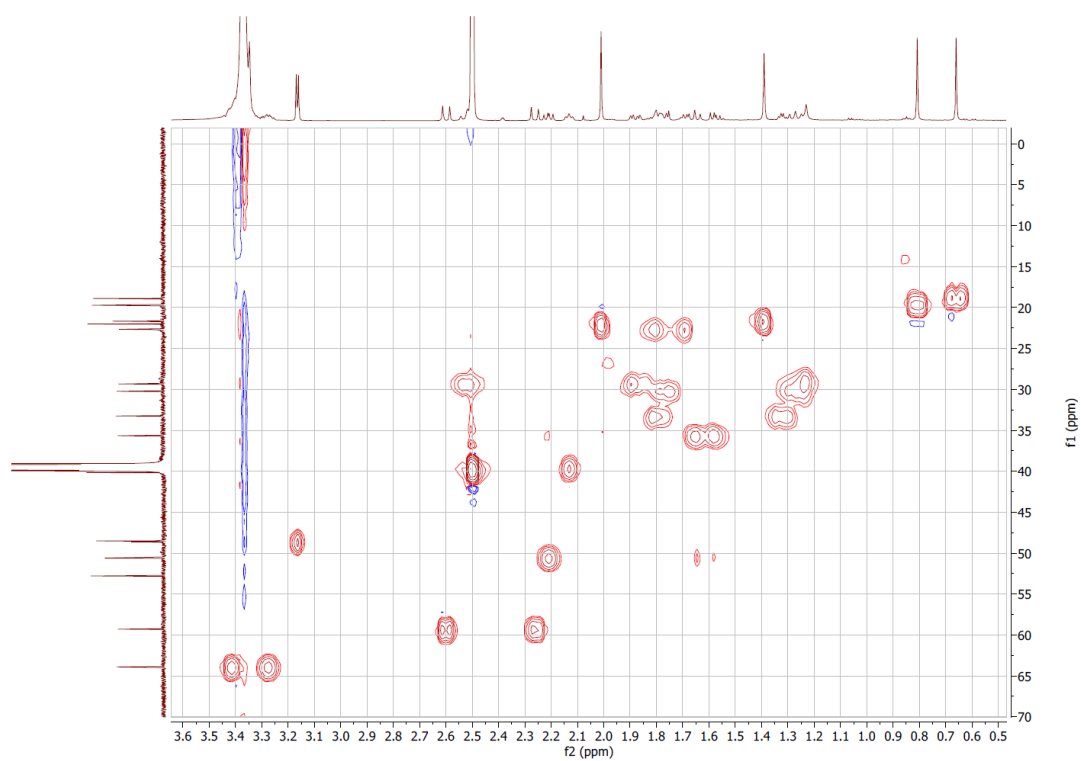

**Figure S24.** HSQC (DMSO- $d_6$ ) spectrum of compound **4**, at 25°C.

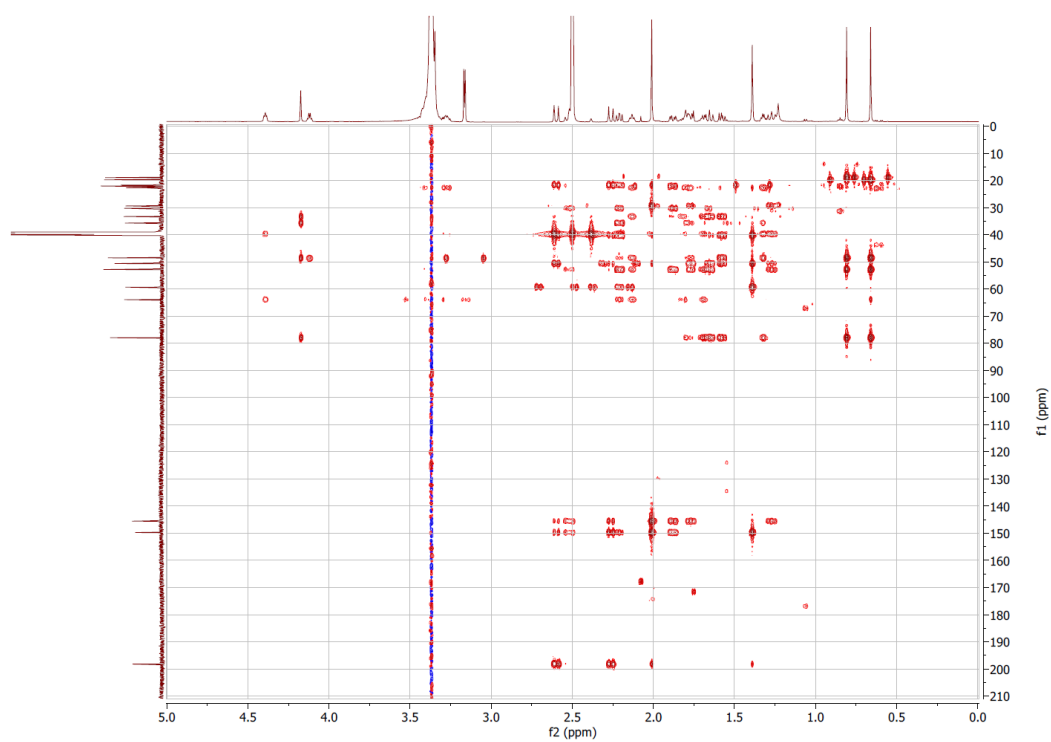

**Figure S25.** HMBC (DMSO- $d_6$ ) spectrum of compound **4**, at 25°C.

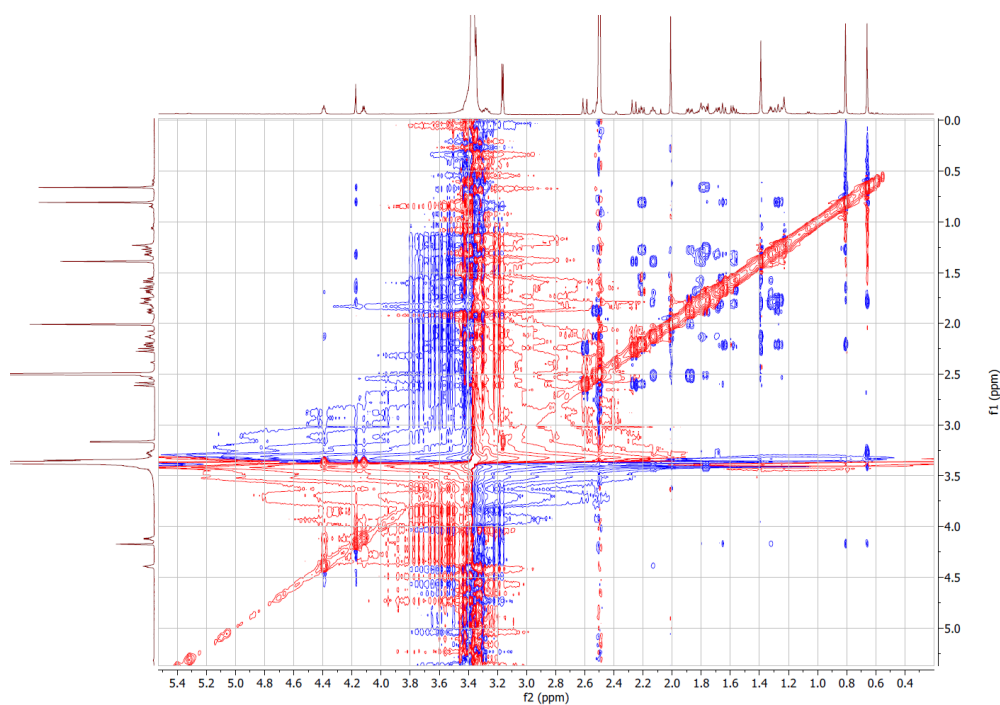

**Figure S26.** ROESY (DMSO-*d*<sub>6</sub>) spectrum of compound **4**, at 25°C.

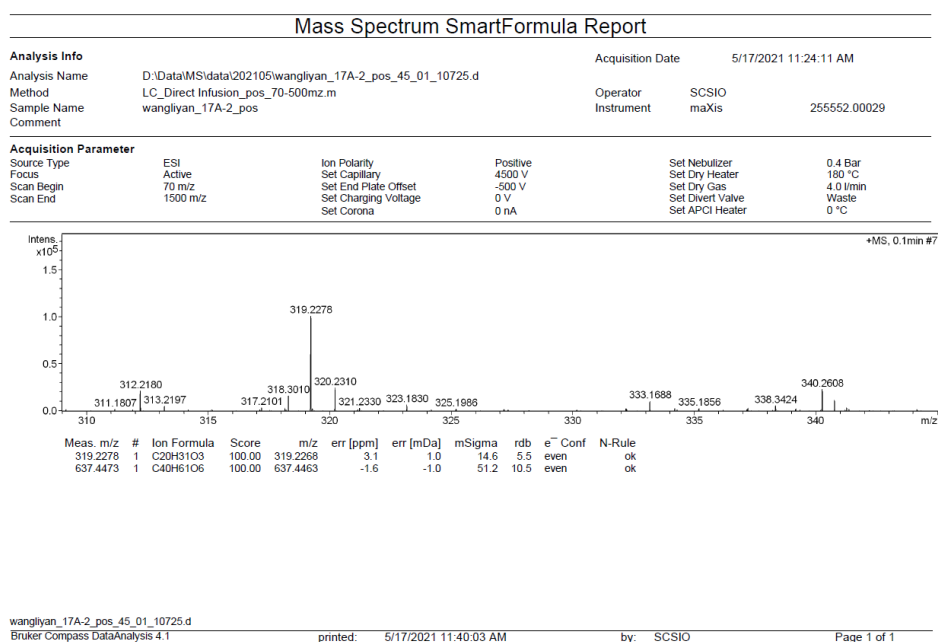

**Figure S27.** HRESIMS spectrum of compound **4**.

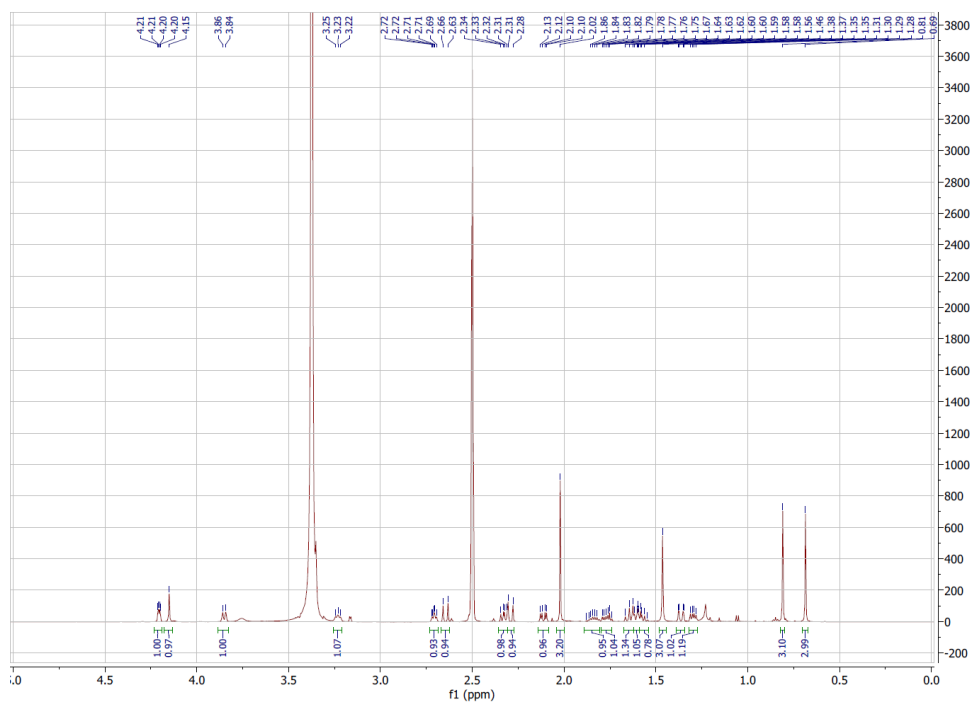

**Figure S28.**  $^1\text{H}$  NMR (600 MHz,  $\text{DMSO}-d_6$ ) spectrum of compound **5**, at 25°C.

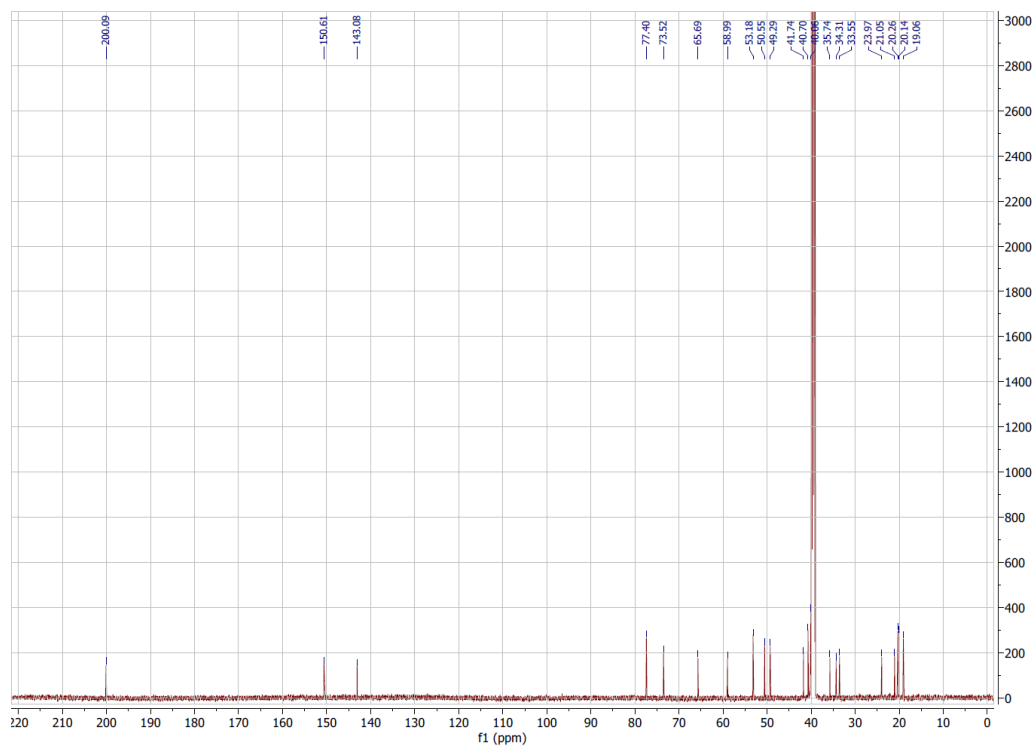

**Figure S29.**  $^{13}\text{C}$  NMR (150 MHz, DMSO- $d_6$ ) spectrum of compound **5**, at 25°C.

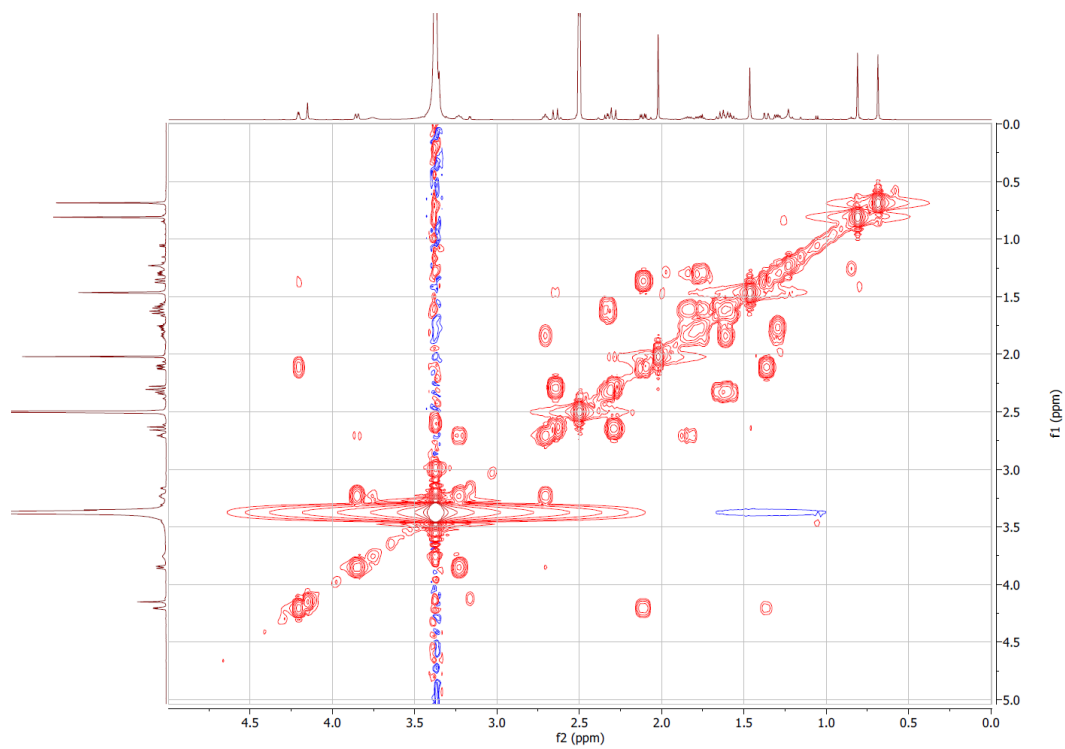

**Figure S30.**  $^1\text{H}$ - $^1\text{H}$  COSY ( $\text{DMSO-}d_6$ ) spectrum of compound **5**, at  $25^\circ\text{C}$ .

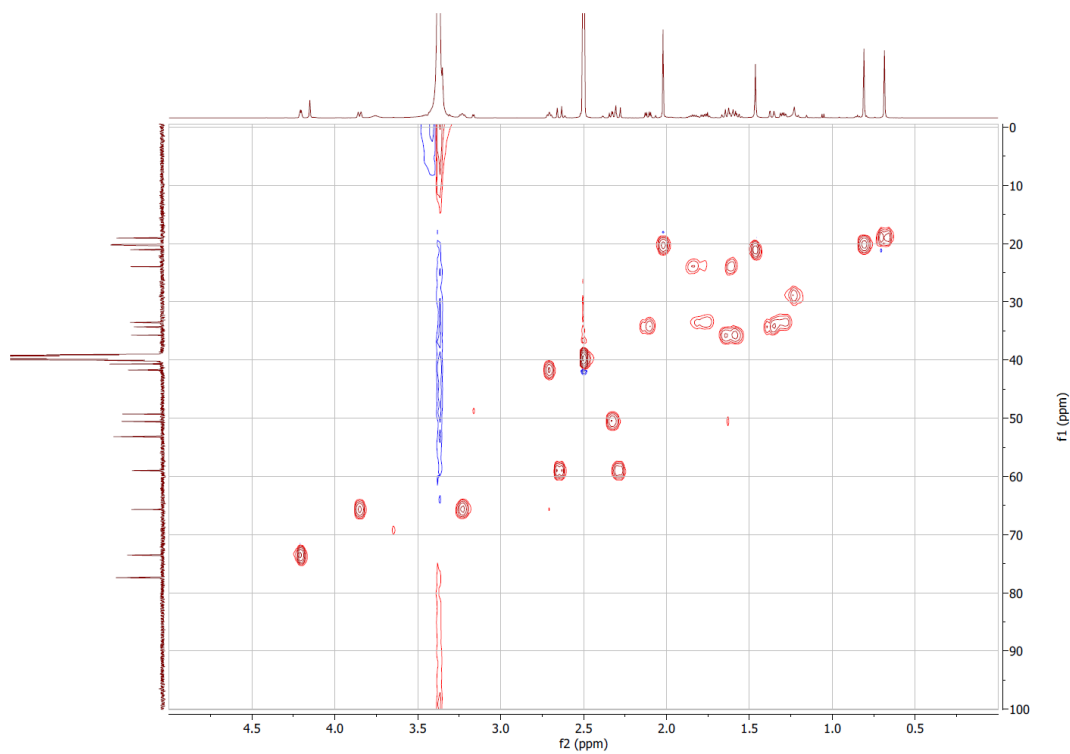

**Figure S31.** HSQC ( $\text{DMSO-}d_6$ ) spectrum of compound **5**, at  $25^\circ\text{C}$ .

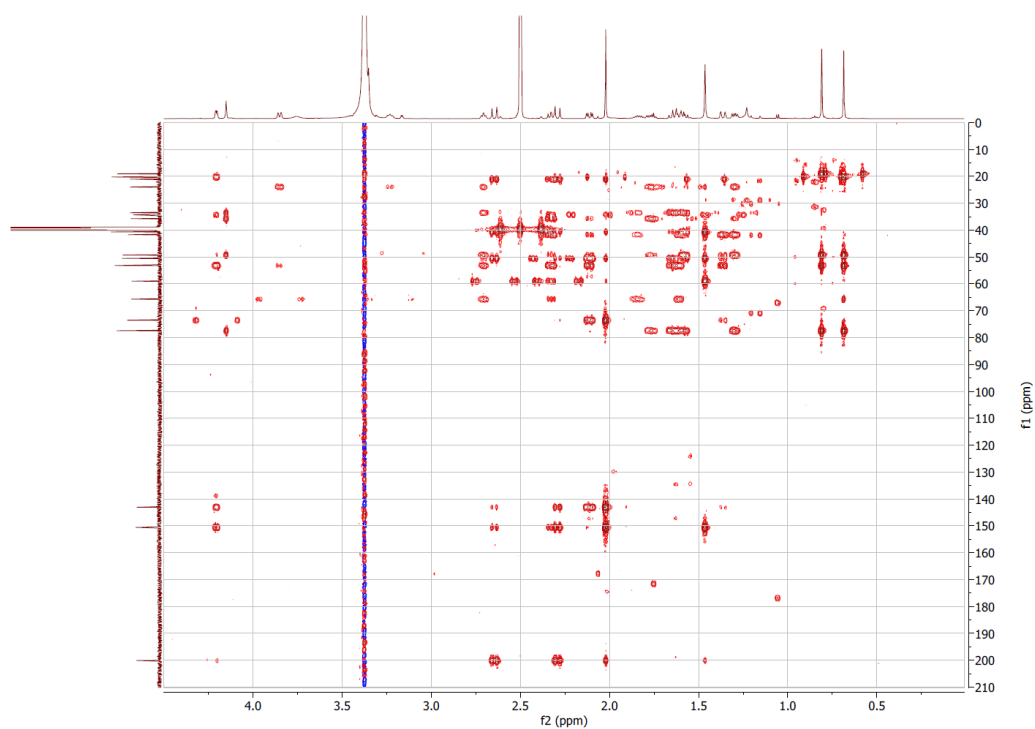

**Figure S32.** HMBC (DMSO- $d_6$ ) spectrum of compound **5**, at 25°C.

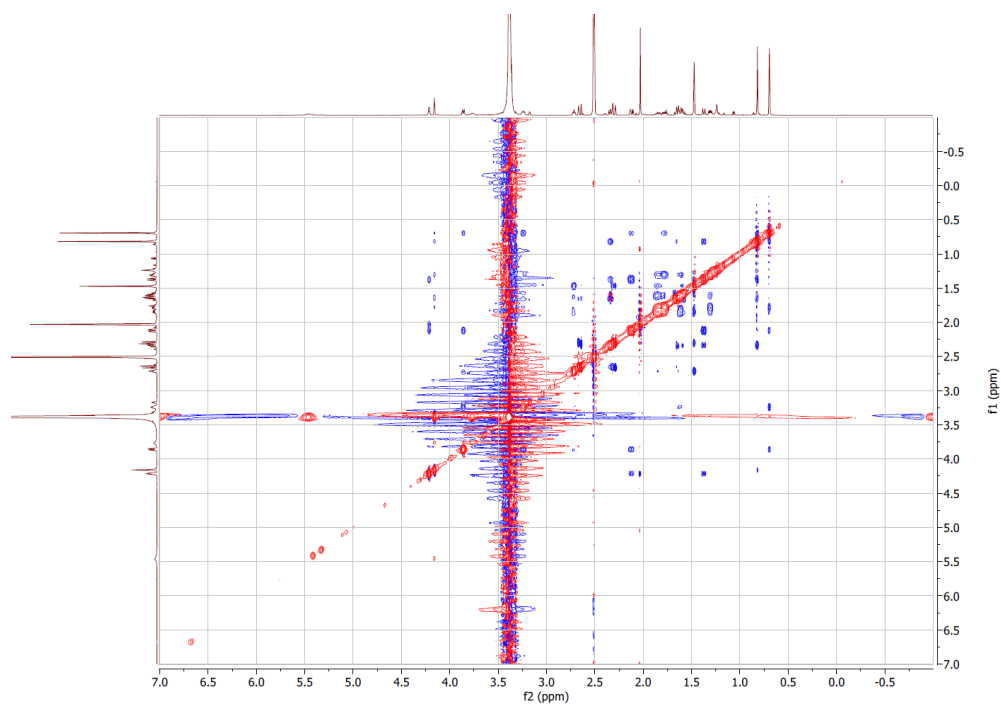

**Figure S33.** ROESY (DMSO- $d_6$ ) spectrum of compound **5**, at 25°C.

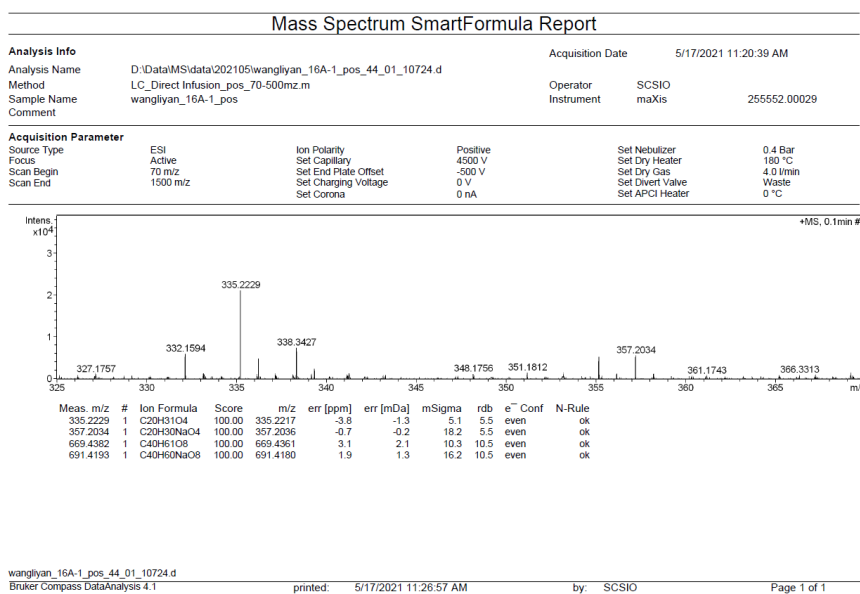

**Figure S34.** HRESIMS spectrum of compound **5**.

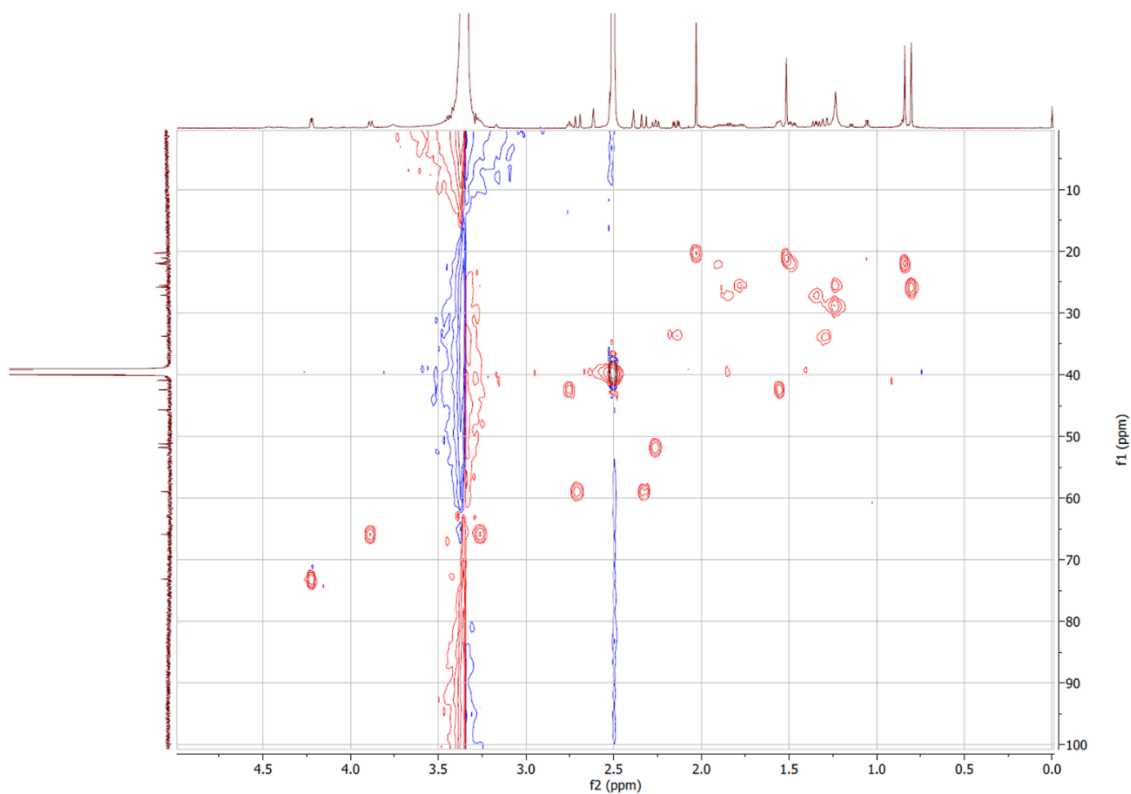

**Figure S35.** <sup>1</sup>H NMR (600 MHz, DMSO-*d*<sub>6</sub>) spectrum of compound **6**, at 25°C.

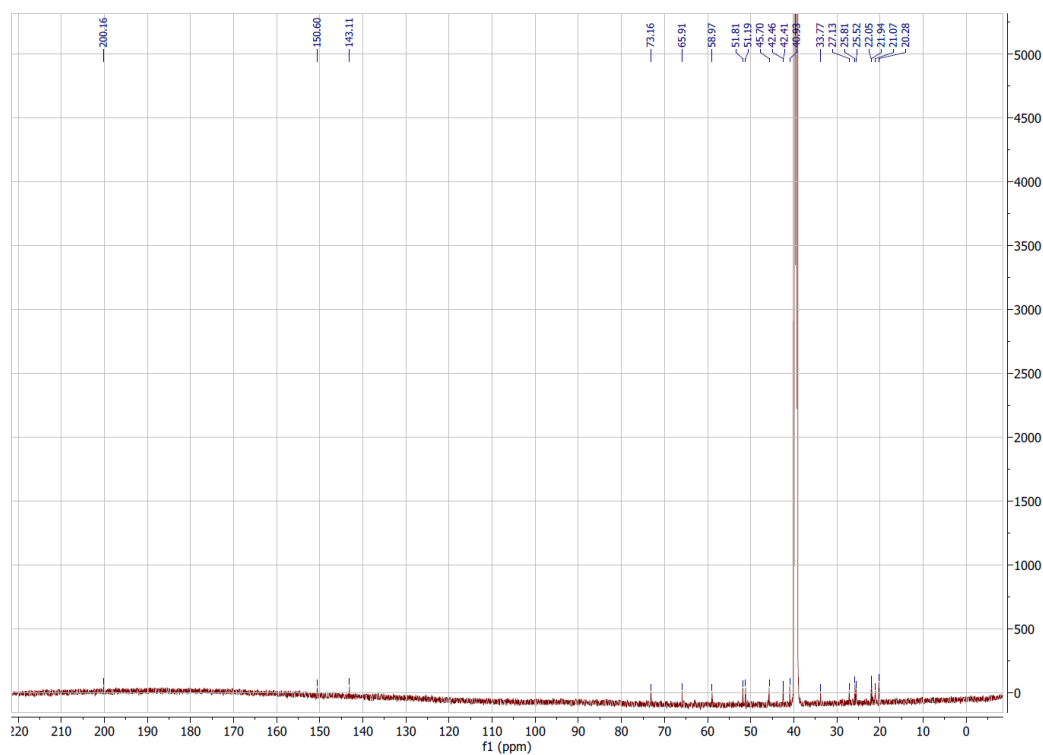

**Figure S36.**  $^{13}\text{C}$  NMR (150 MHz,  $\text{DMSO-}d_6$ ) spectrum of compound **6**, at 25°C.

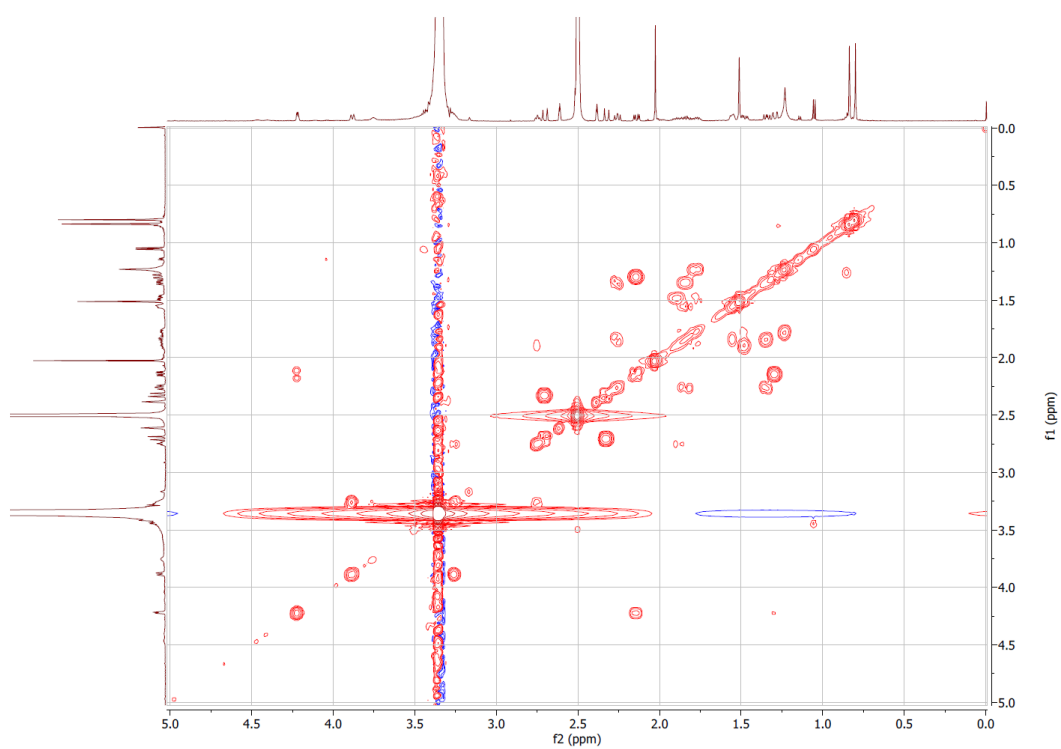

**Figure S37.**  $^1\text{H}$ - $^1\text{H}$  COSY ( $\text{DMSO-}d_6$ ) spectrum of compound **6**, at 25°C.



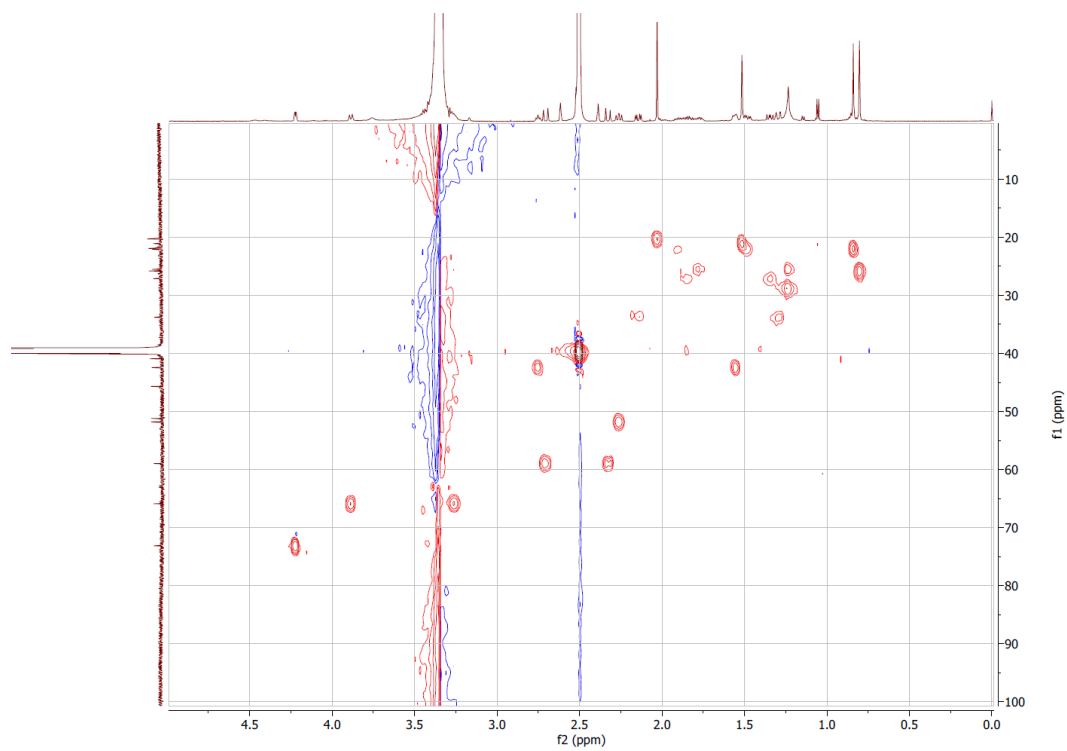

**Figure S38.** HSQC (DMSO-*d*<sub>6</sub>) spectrum of compound **6**, at 25°C.

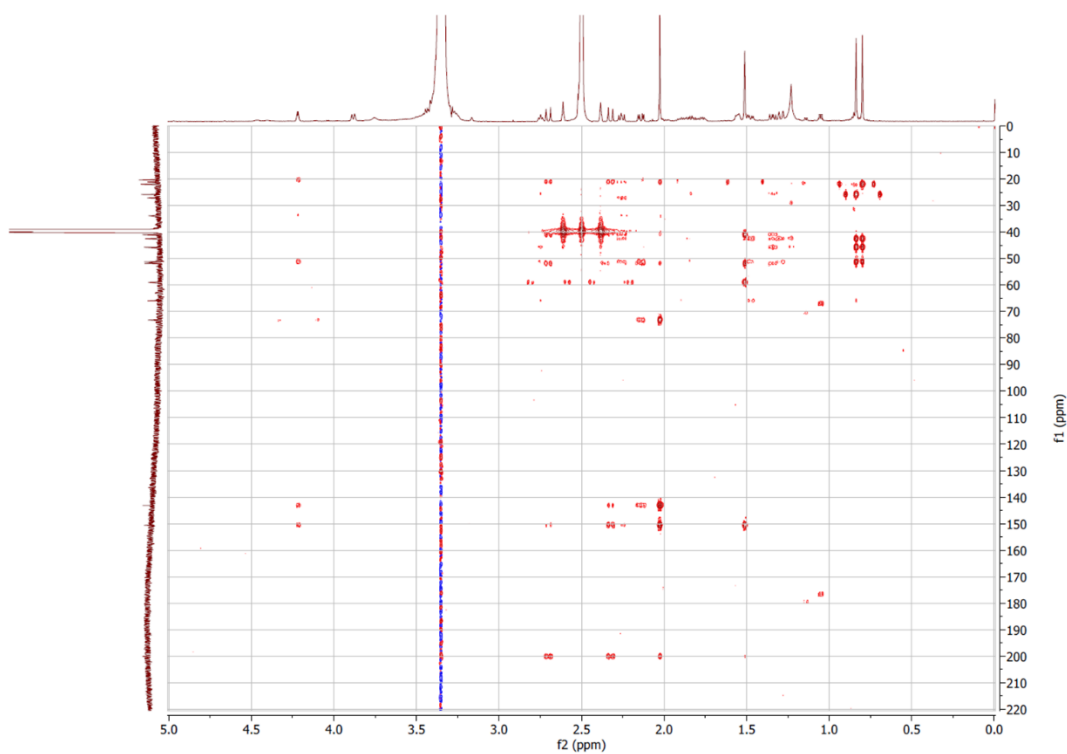

**Figure S39.** HMBC (DMSO-*d*<sub>6</sub>) spectrum of compound **6**, at 25°C.

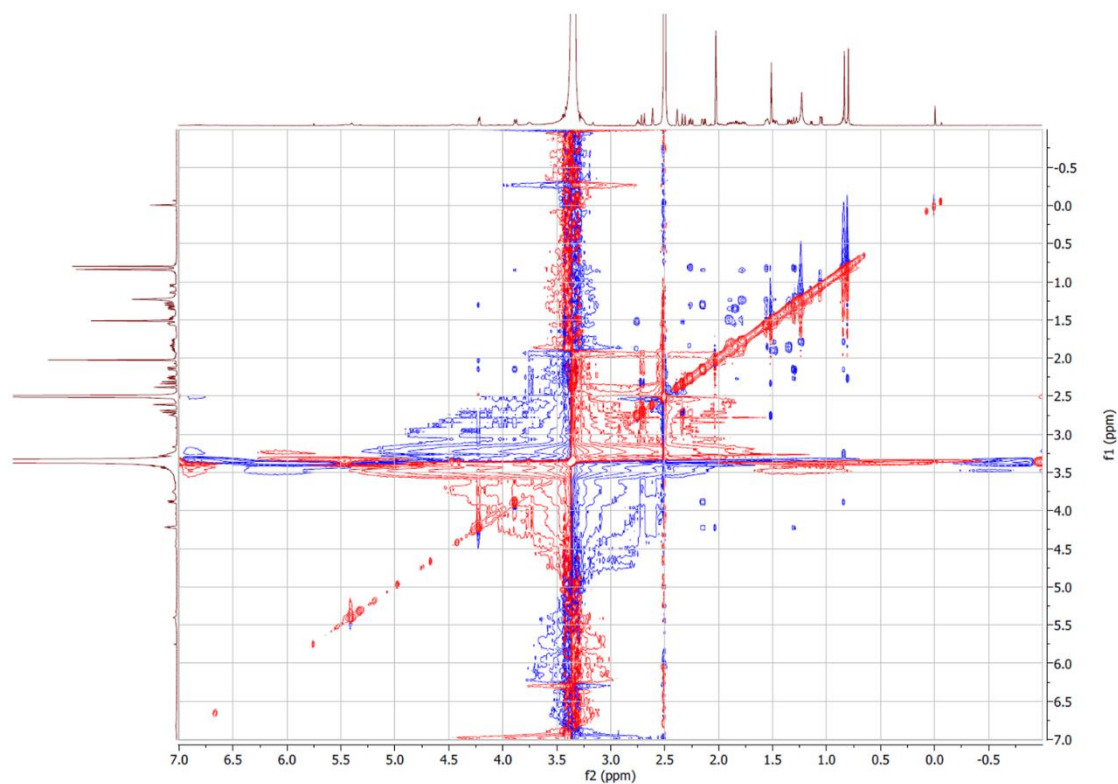

**Figure S40.** ROESY (DMSO-*d*<sub>6</sub>) spectrum of compound **6**, at 25°C.

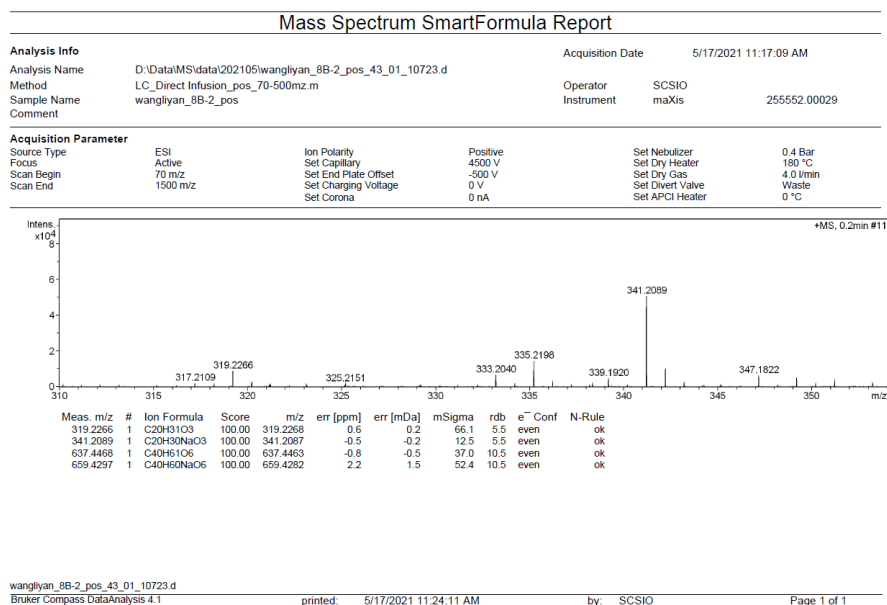

**Figure S41.** HRESIMS spectrum of compound **6**.

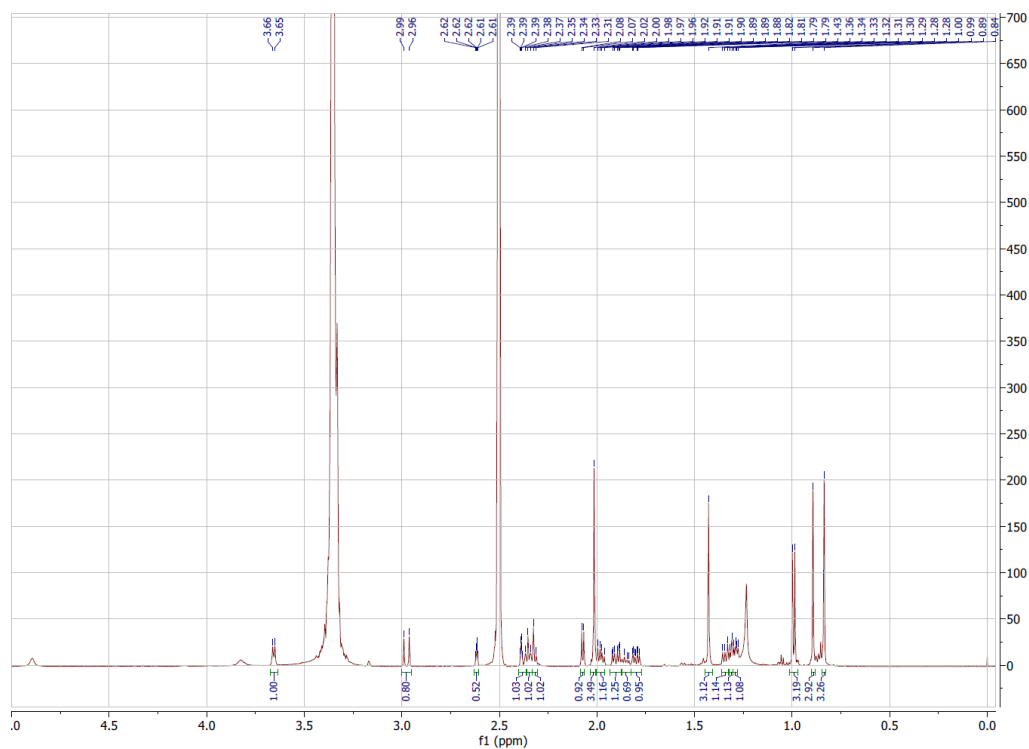

**Figure S42.** <sup>1</sup>H NMR (600 MHz, DMSO-*d*<sub>6</sub>) spectrum of compound **7**, at 25°C.

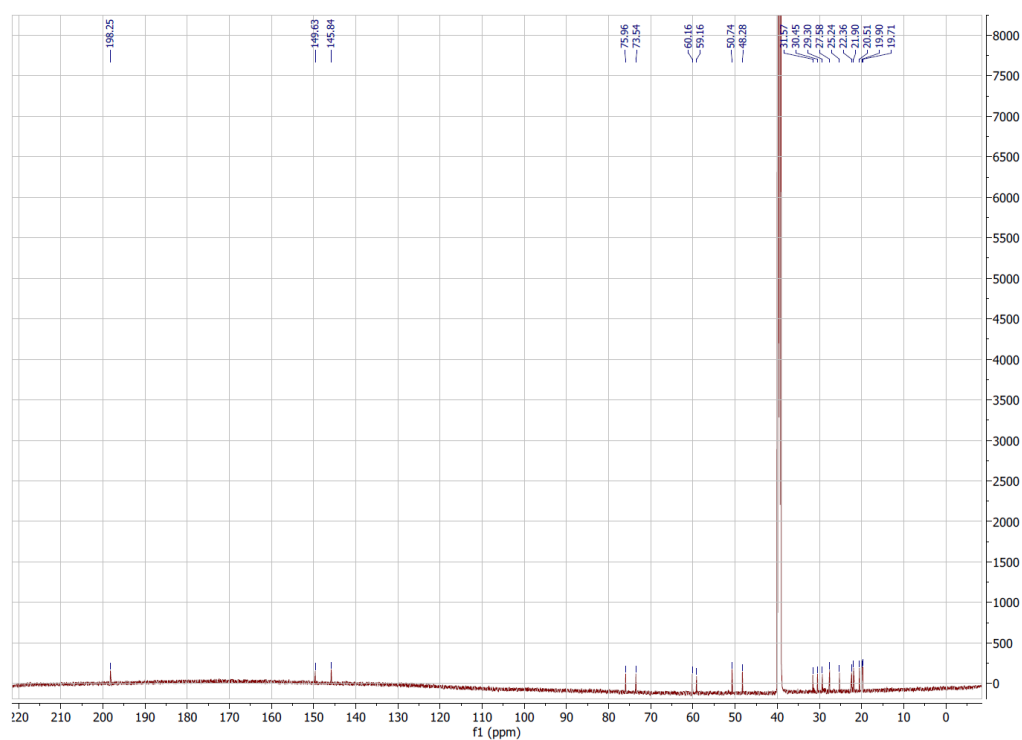

**Figure S43.** <sup>13</sup>C NMR (150 MHz, DMSO-*d*<sub>6</sub>) spectrum of compound **7**, at 25°C.

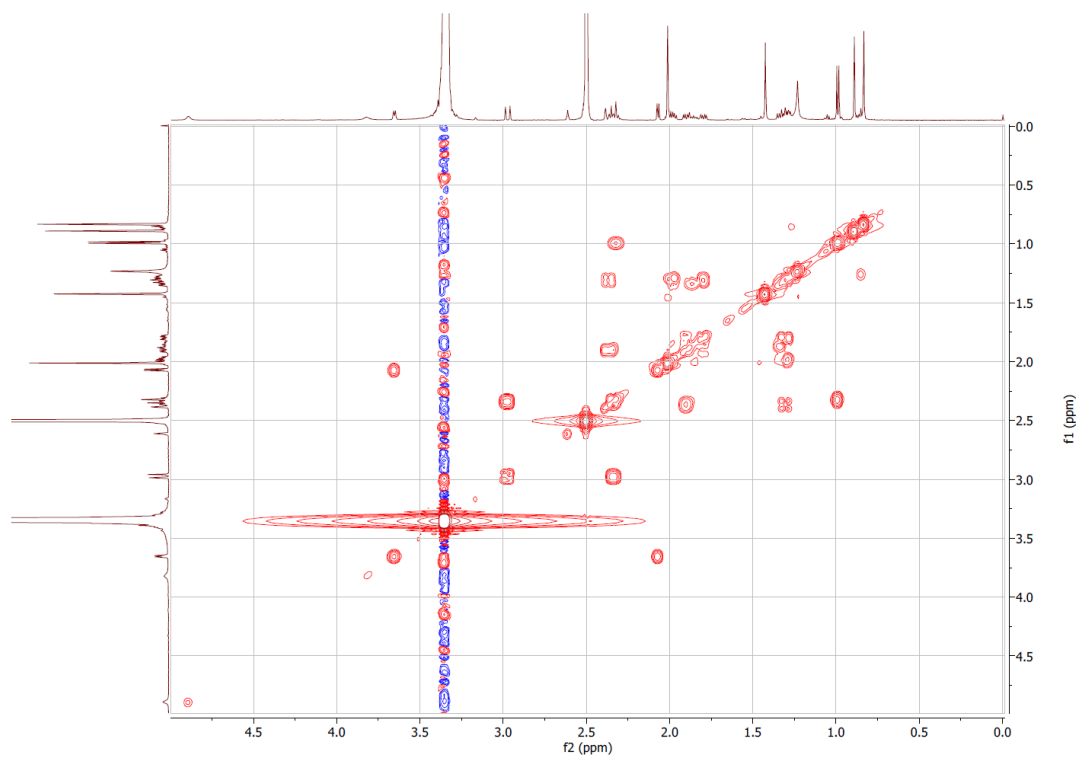

**Figure S44.**  $^1\text{H}$ - $^1\text{H}$  COSY (DMSO- $d_6$ ) spectrum of compound **7**, at 25°C.

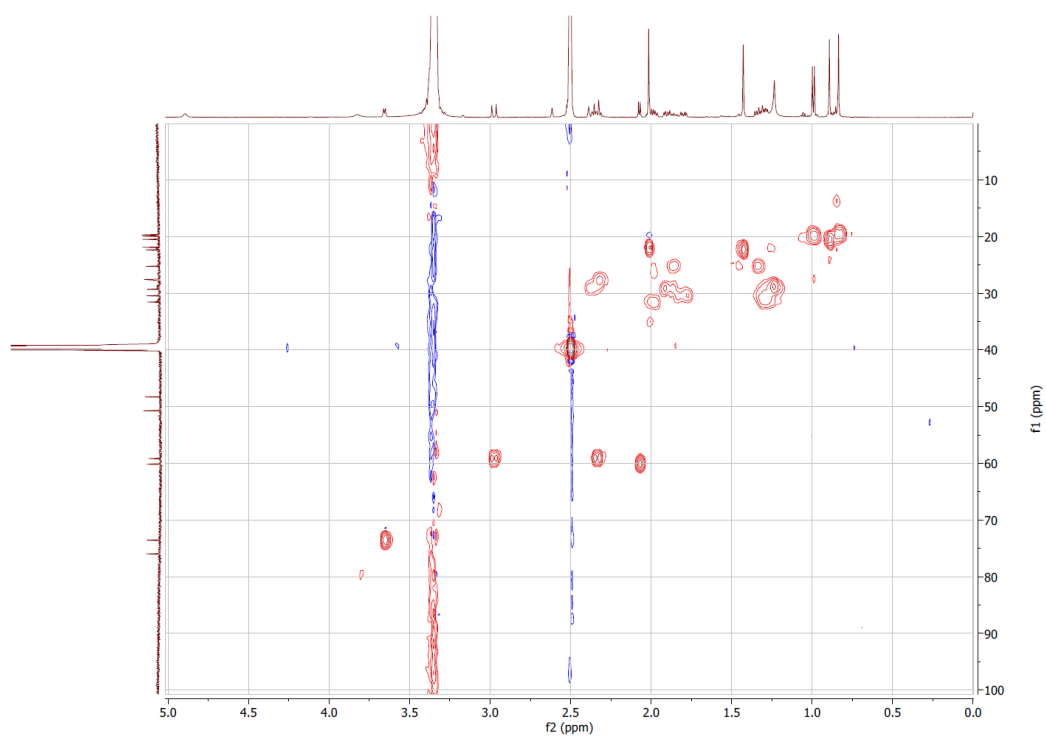

**Figure S45.** HSQC (DMSO- $d_6$ ) spectrum of compound **7**, at 25°C.

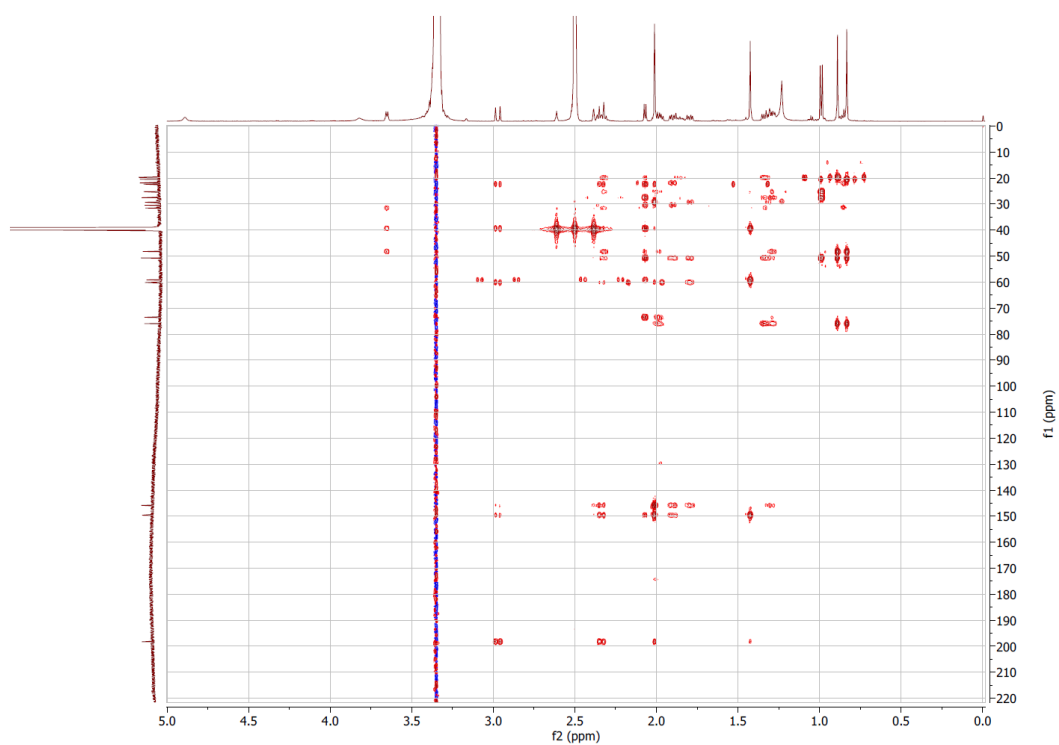

**Figure S46.** HMBC (DMSO-*d*<sub>6</sub>) spectrum of compound **7**, at 25°C.

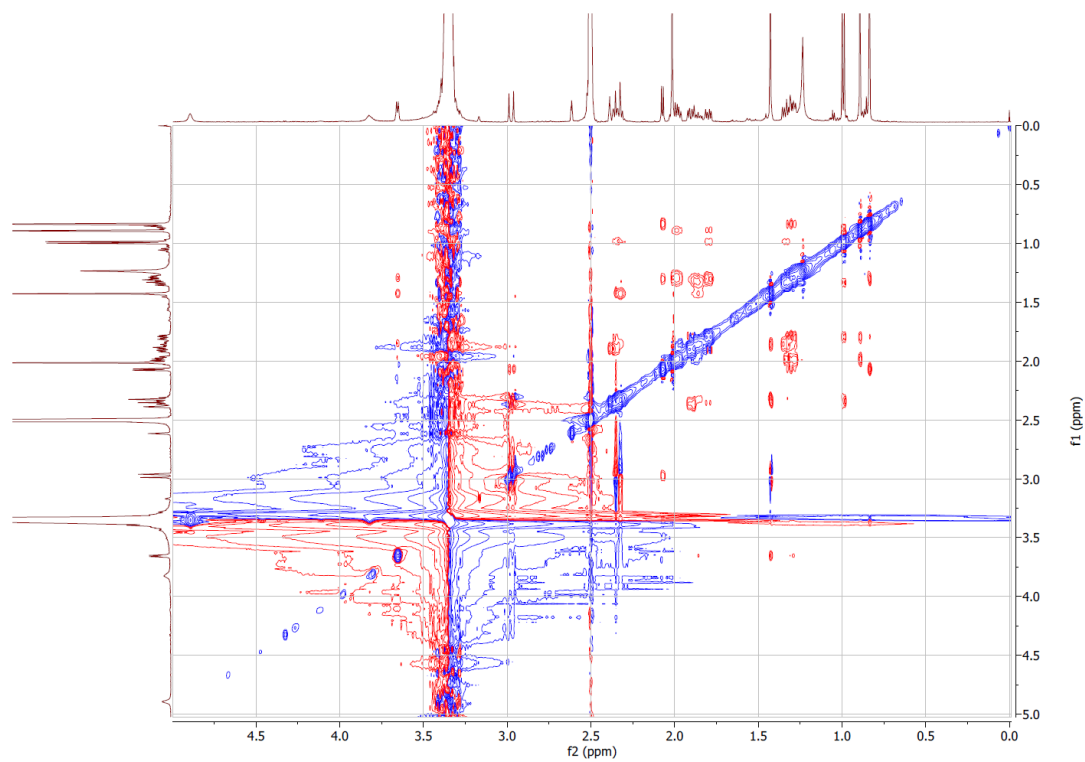

**Figure S47.** ROESY (DMSO-*d*<sub>6</sub>) spectrum of compound **7**, at 25°C.

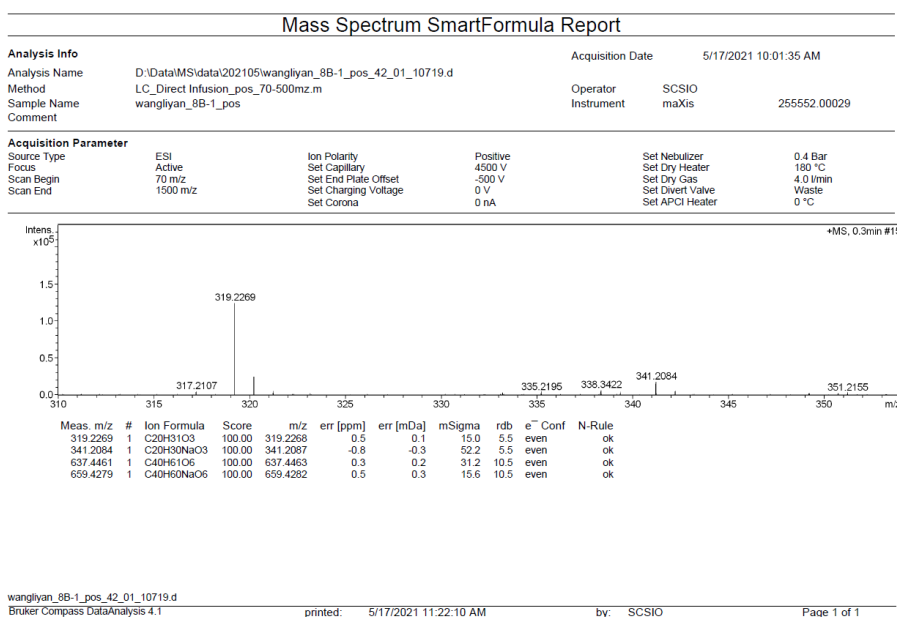

**Figure S48.** HRESIMS spectrum of compound **7**.

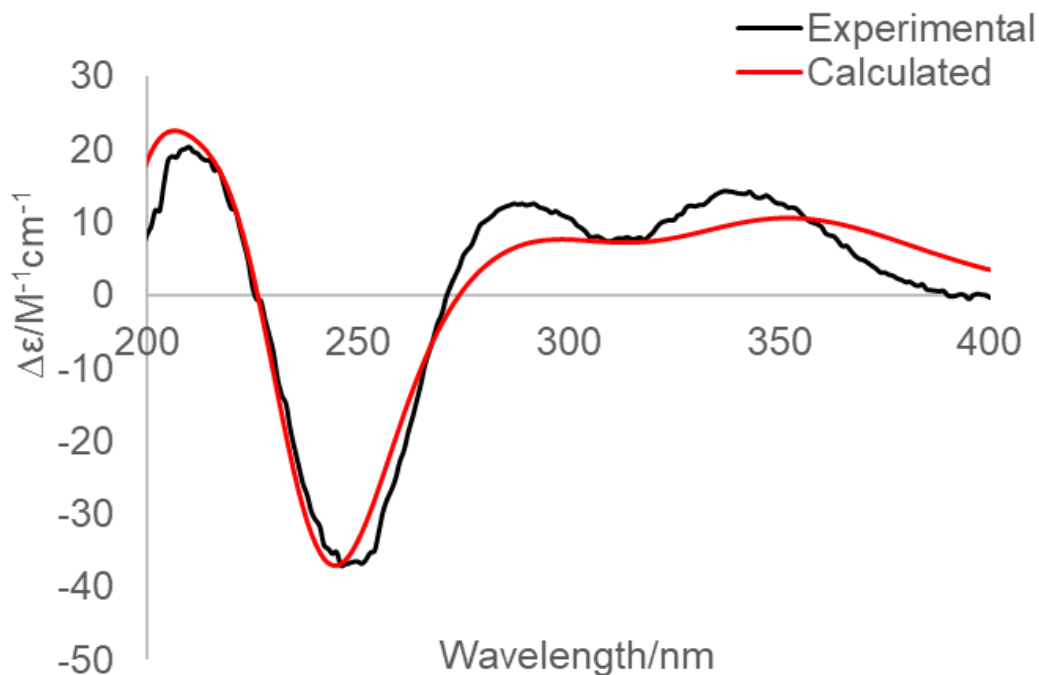

**Figure S49.** Comparison of the calculated ECD spectrum of (2*S*, 5*R*, 6*R*, 8*S*, 13*S*, 14*S*)-**1** at the B3LYP/6-311+G(d, p) level with the experimental ECD spectrum of **1** in MeOH,  $\sigma = 0.41$  eV, shift = +10 nm.

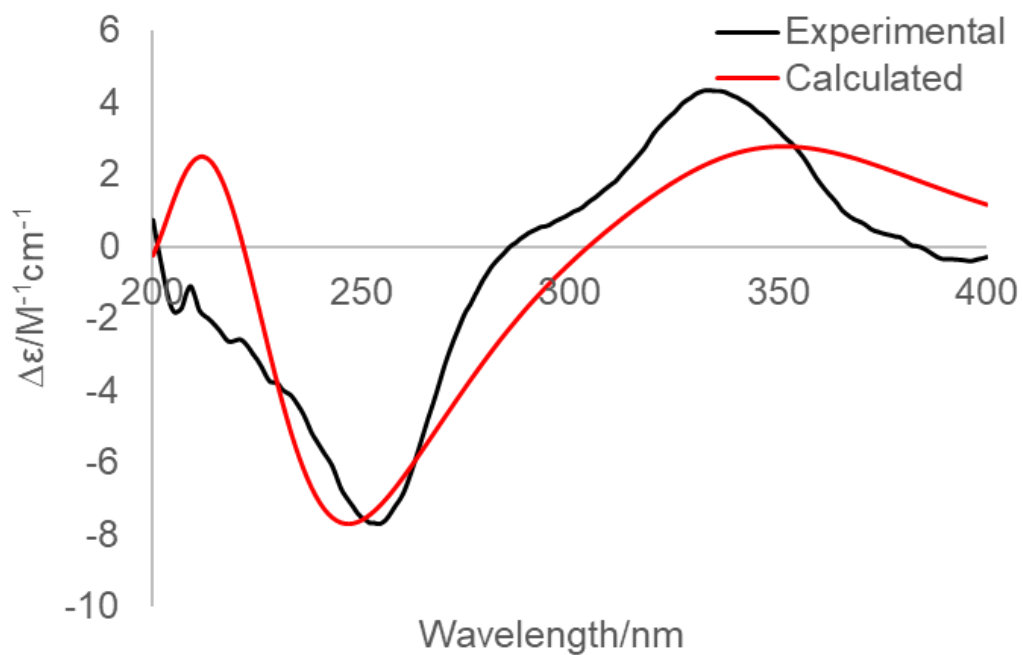

**Figure S50.** Comparison of the calculated ECD spectrum of *2S, 5R, 6R, 13S, 14S*-**4** at the B3LYP/6-311+G(d, p) level with the experimental ECD spectrum of **4** in MeOH,  $\sigma = 0.49$  eV, shift = +10 nm.

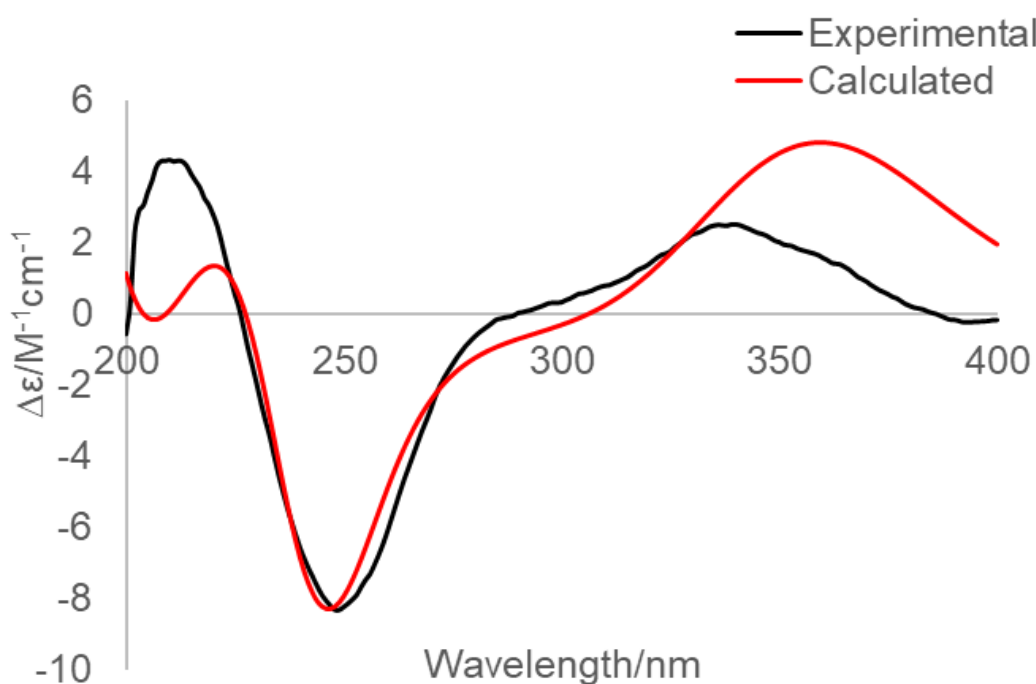

**Figure S51.** Comparison of the calculated ECD spectrum of (*2S, 5R, 6R, 8S, 13S, 14S*)-**5** at the B3LYP/6-311+G(d, p) level with the experimental ECD spectrum of **5** in MeOH,  $\sigma = 0.40$  eV, shift = +15 nm.

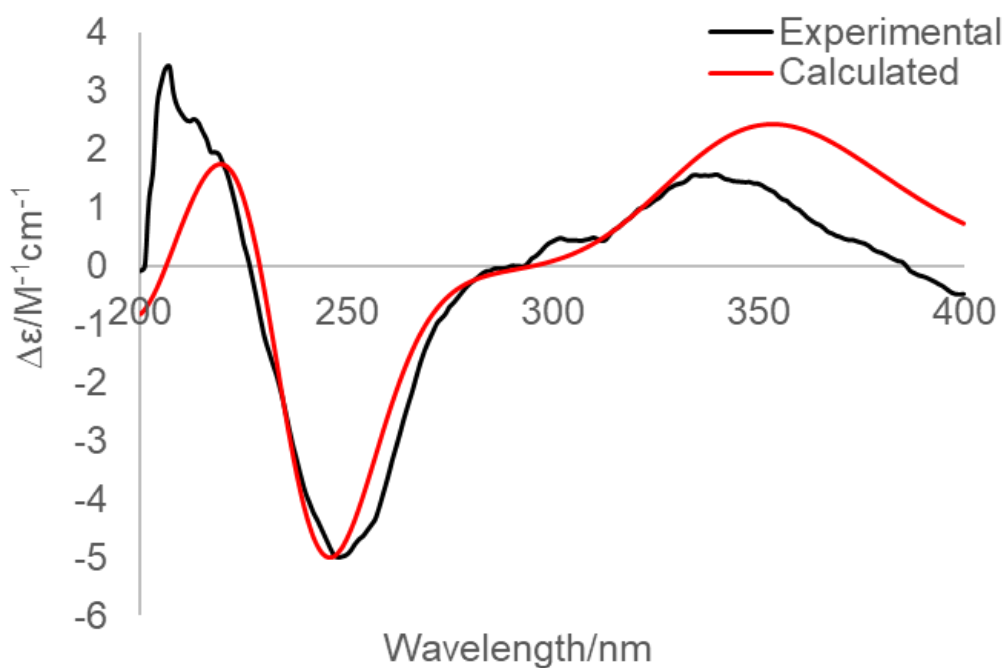

**Figure S52.** Comparison of the calculated ECD spectrum of (2*S*, 5*R*, 6*R*, 8*S*, 13*S*, 14*S*)-**6** at the B3LYP/6-311+G(d, p) level with the experimental ECD spectrum of **6** in MeOH,  $\sigma = 0.39$  eV, shift = +9 nm.

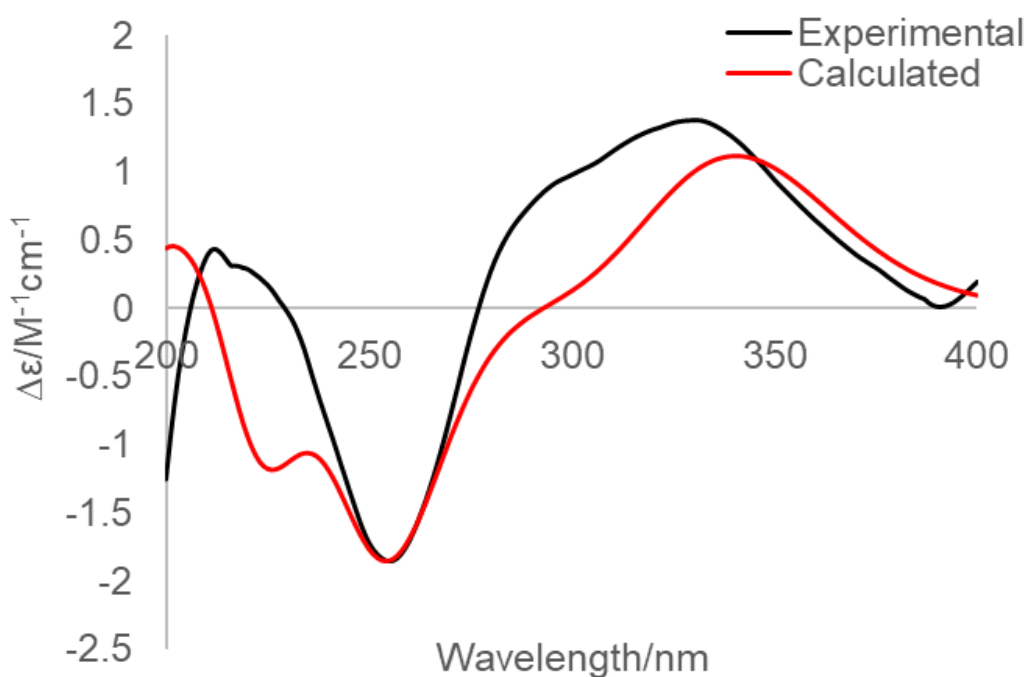

**Figure S53.** Comparison of the calculated ECD spectrum of (2*S*, 5*R*, 6*R*, 13*S*, 14*S*, 15*S*)-**7** at the B3LYP/6-311+G(d, p) level with the experimental ECD spectrum of **7** in MeOH,  $\sigma = 0.34$  eV, shift = -2 nm.
